# Supplementary material for: Tubulin alpha-1b chain was identified as a prognosis and immune biomarker in pan-cancer combing with experimental validation in breast cancer
Source: Springer Nature journal article supplement (doi:10.1038/s41598-024-58982-z), 2024-04-08
Supplement: MOESM1 [file 41598_2024_58982_MOESM1_ESM.pdf]

**Supplementary materials for**  
**Tubulin alpha-1b chain was identified as a prognosis and immune**  
**biomarker in pan-cancer combing with experimental validation in**  
**breast cancer**

**Yiyang Wang<sup>1†</sup>, Yongxiang Li<sup>1†</sup>, Yubo Jing<sup>1</sup>, Yuqi Yang<sup>2</sup>, Haiyan Wang<sup>1</sup>, Dilimulati Ismtula<sup>1</sup>, Chenming Guo<sup>1\*</sup>**

1 Department of Breast Surgery, Center of Digestive and Vascular, The First Affiliated Hospital of Xinjiang Medical University, Urumqi 830054, China;

2 The First Clinical Medical College of Xinjiang Medical University, Urumqi 830054, China;

\*Corresponding author.

†These authors contributed equally to this work and share the first authorship.

\*Correspondence: Chenming Guo, [gcm\\_xjmu@yeah.net](mailto:gcm_xjmu@yeah.net).

Additional material for this article can be found in the Supplementary Graphics and Table Legend module.

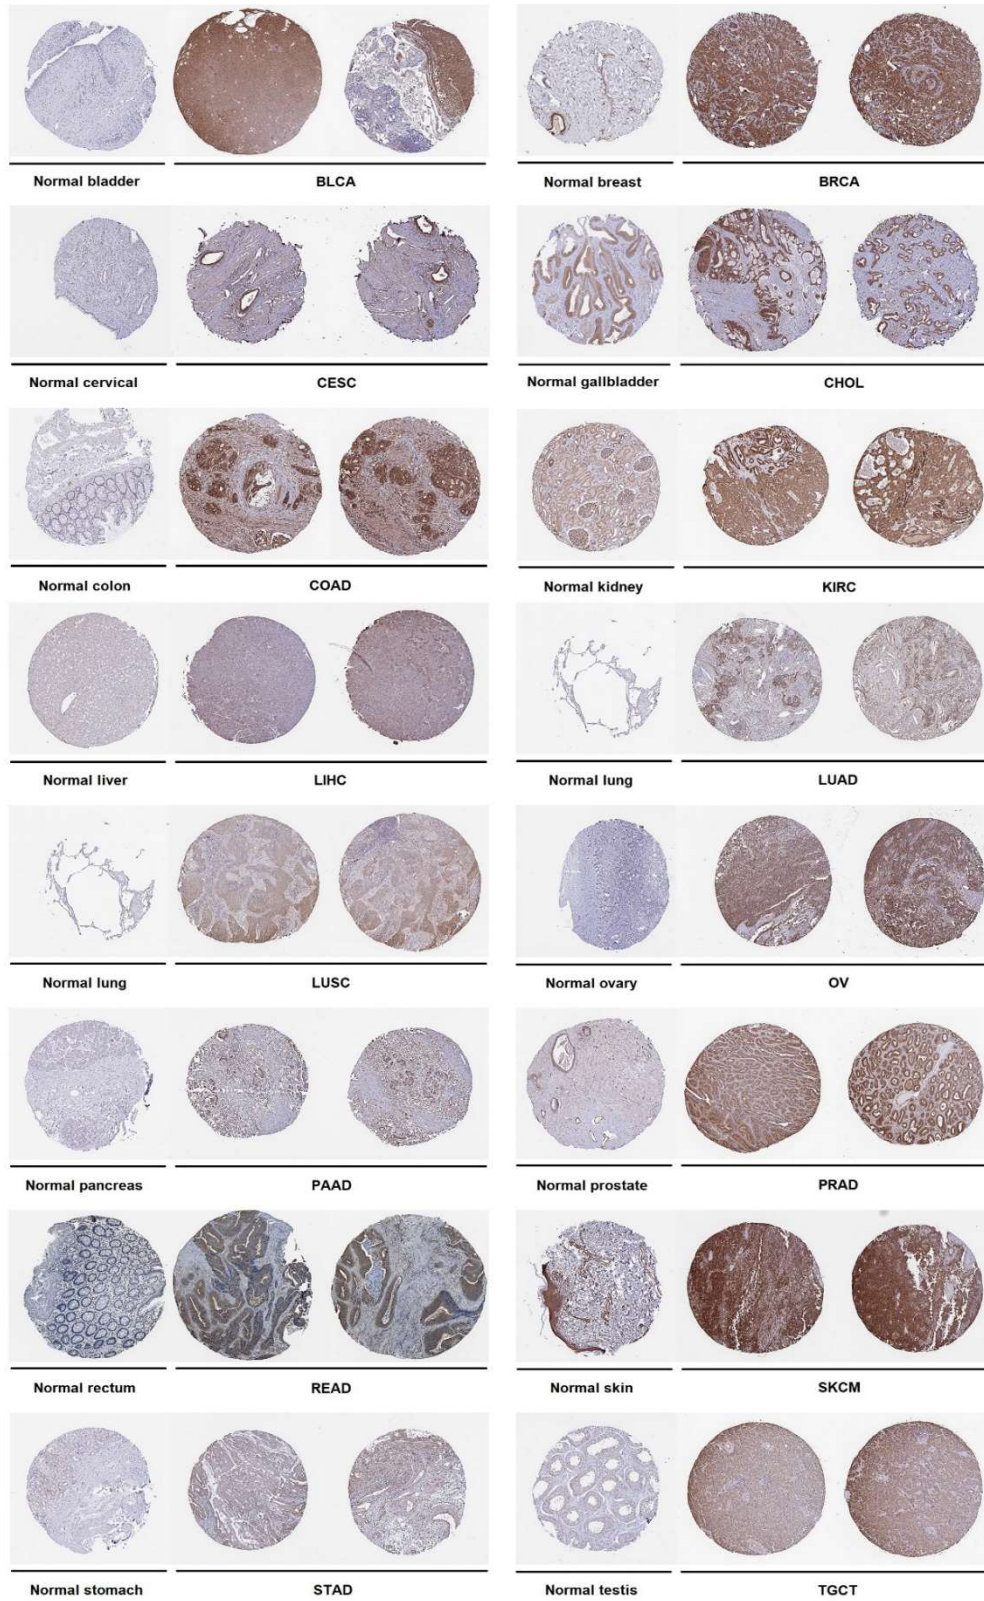

**Supplementary Figure S1.** Immunohistochemical Staining of 16 Normal Tissues and Tumor Tissues from the HPA Database.

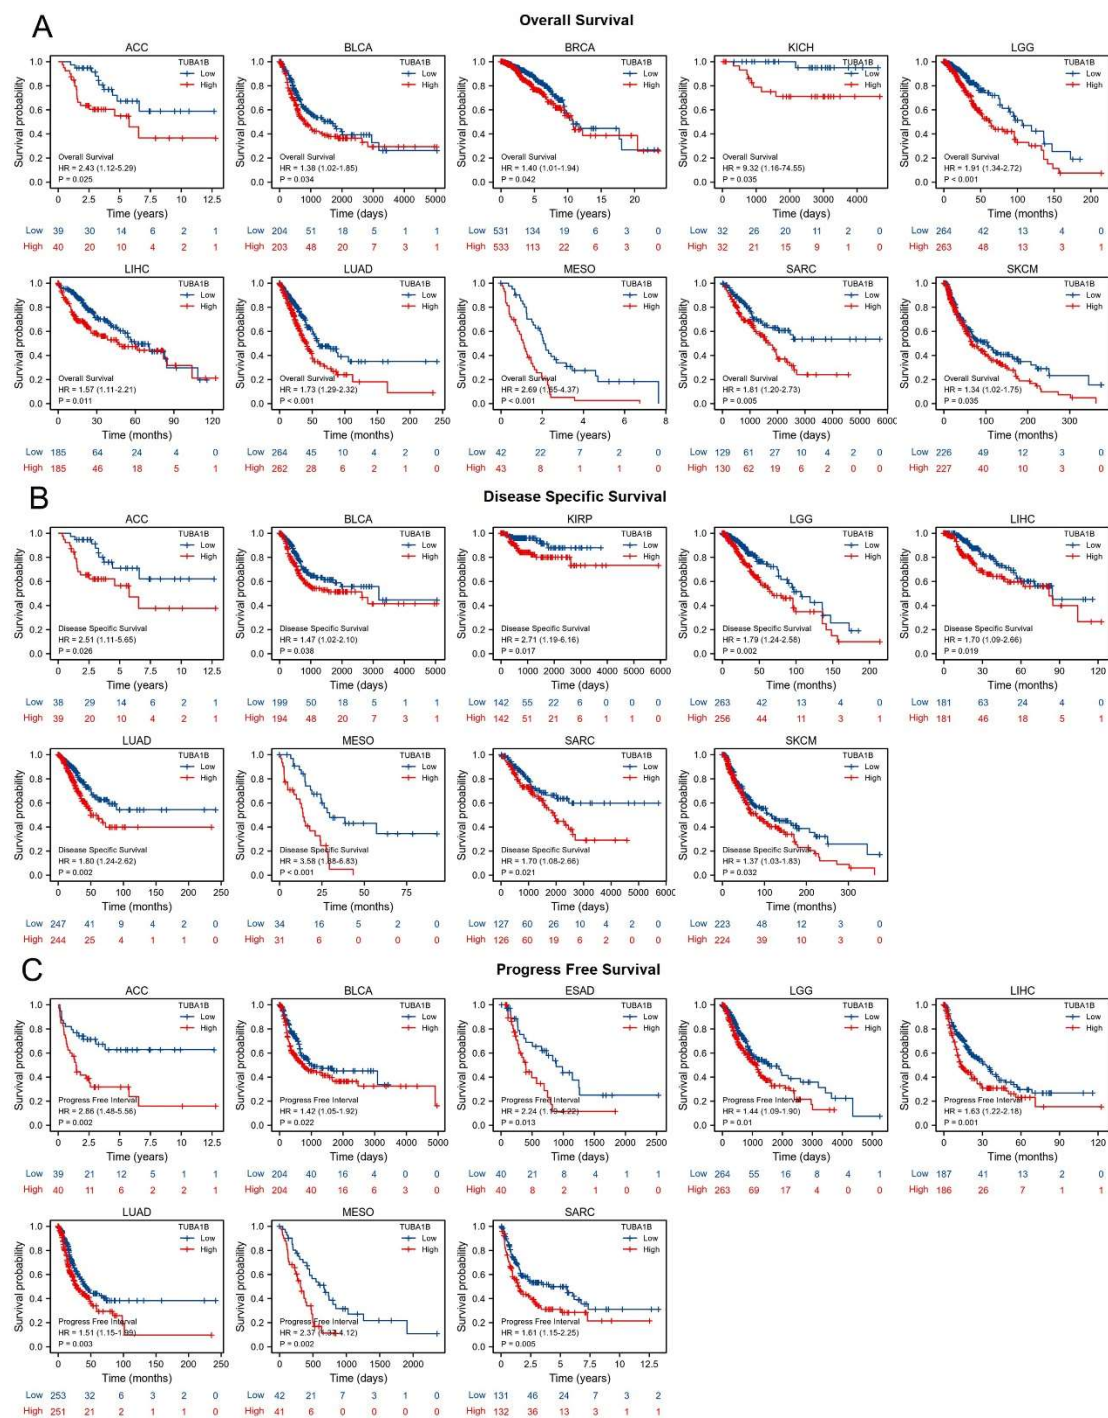

**Supplementary Figure S2.** Kaplan-Meier (KM) Curves Showing the Detailed Association Between TUBA1B Expression and Prognosis in Cancer Patients. **(A)** Overall Survival (OS) in ACC, BLCA, BRCA, KICH, LGG, LIHC, LUAD, MESO, SARC, and SKCM. **(B)** Disease-Specific Survival (DSS) in ACC, BLCA, KIRP, LGG, LIHC, LUAD, MESO, SARC, and SKCM. **(C)** Progression-free survival (PFS) in ACC, BLCA, E

SAD, LGG, LIHC, LUAD, MESO, and SARC.

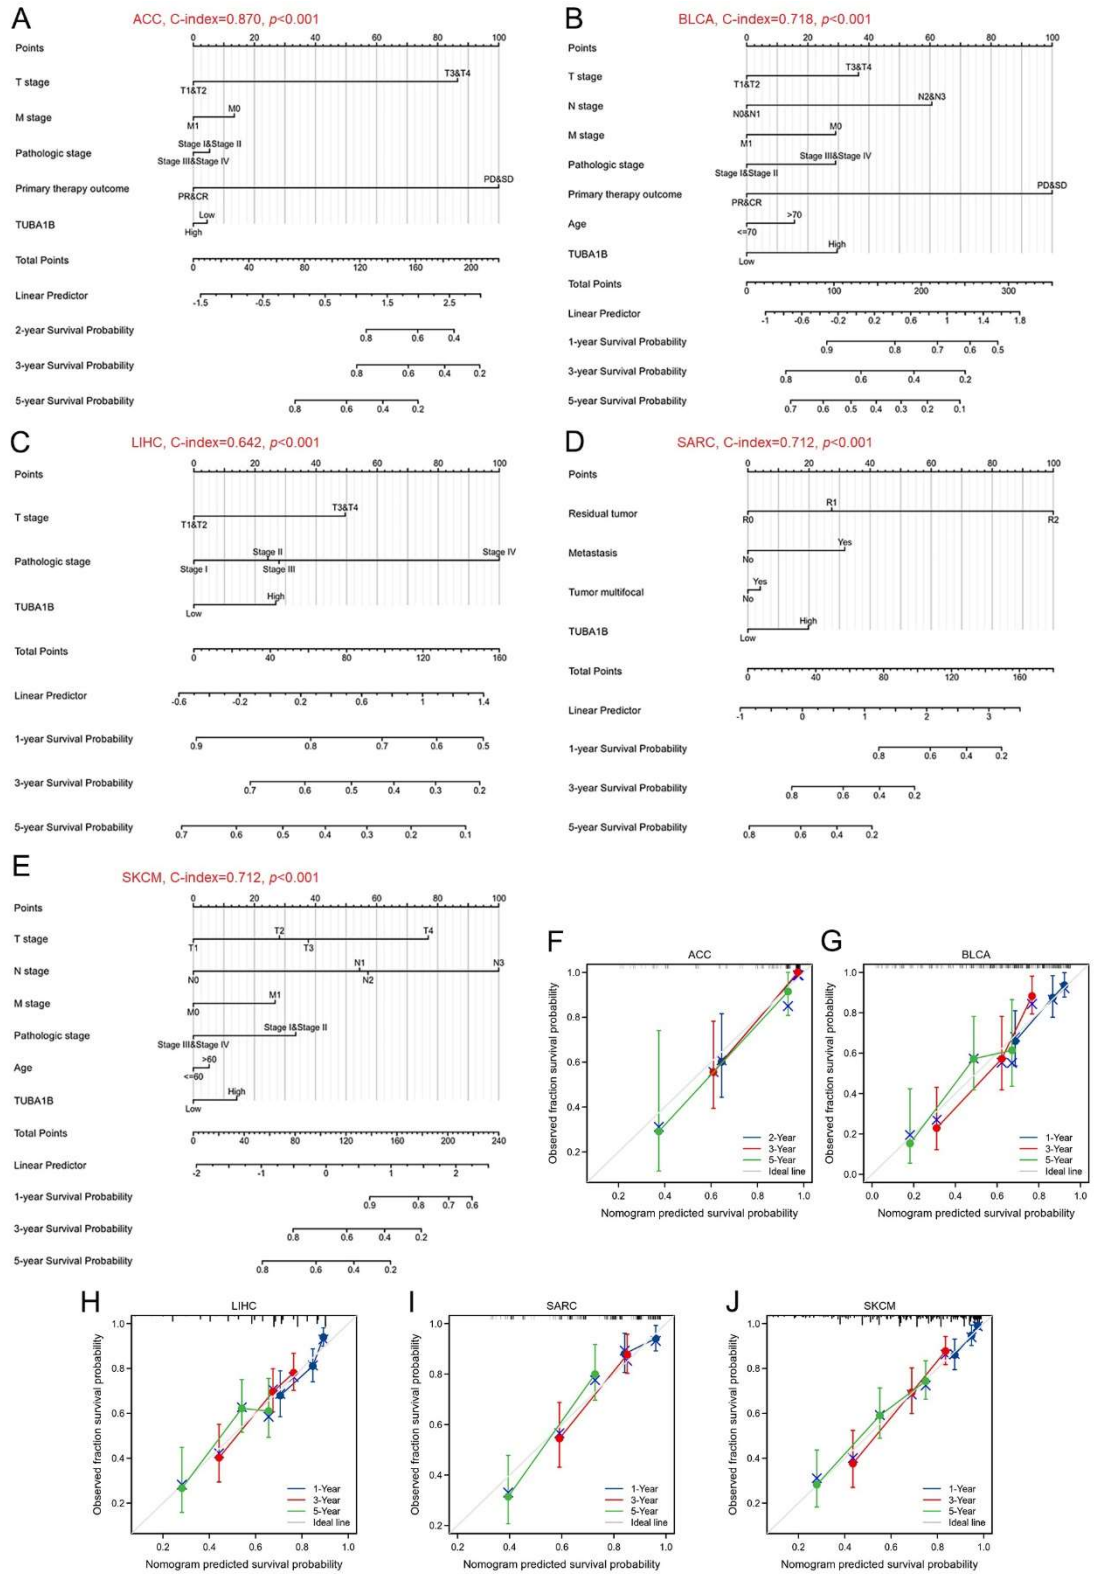

**Supplementary Figure S3.** Nomograms and Calibration Curves Predicting Patient OS in 5 Cancers. Nomograms of ACC (A), BLCA (B), LIHC (C), SARC (D), and SKC

M (E). Calibration curves of ACC (F), BLCA (G), LIHC (H), SARC (I), SKCM (J).

The horizontal and vertical coordinates represent the model-predicted and actually observed survival probability, respectively. The closer each line is to the ideal line, the better the model.

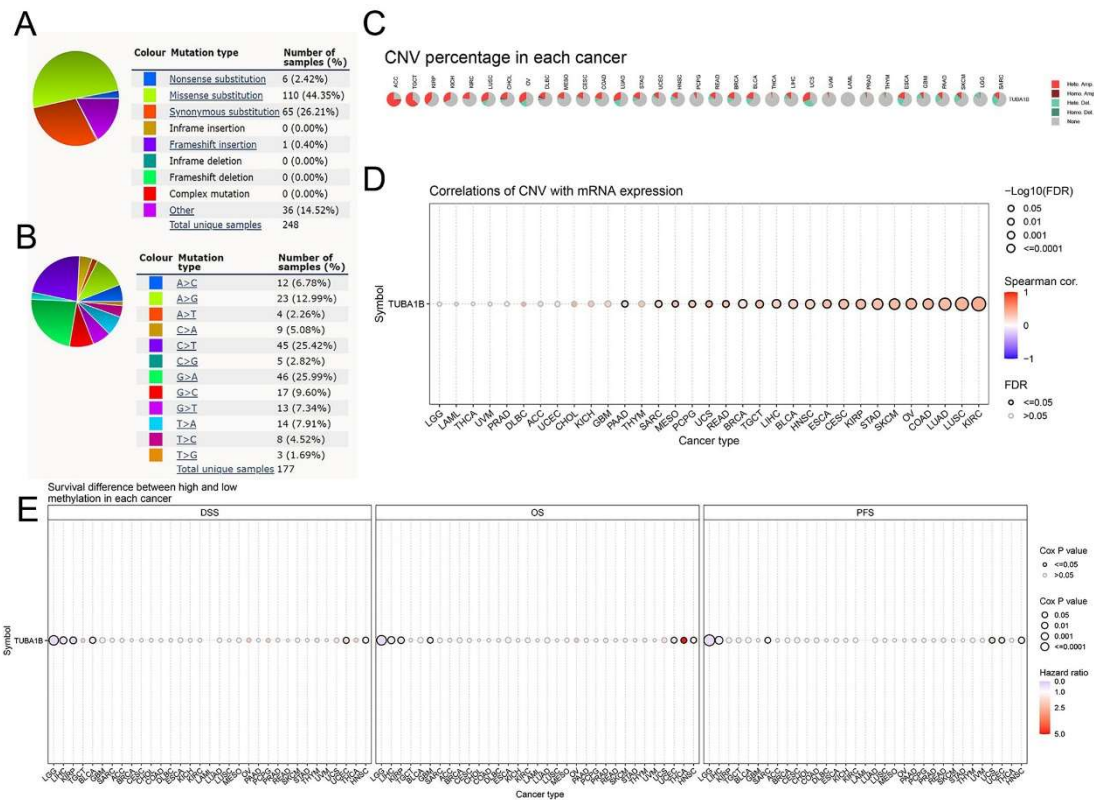

**Supplementary Figure S4.** Mutation analysis and epigenetic methylation analysis of TUBA1B. (A) The main mutation types of TUBA1B. (B) The main types of single nucleotide variants (SNVs) in TUBA1B. (C) Percentage of TUBA1B copy number variants (CNVs) in each cancer. (D) Correlation between TUBA1B expression and CNVs. (E) Effect of TUBA1B methylation levels on prognosis in cancer patients.

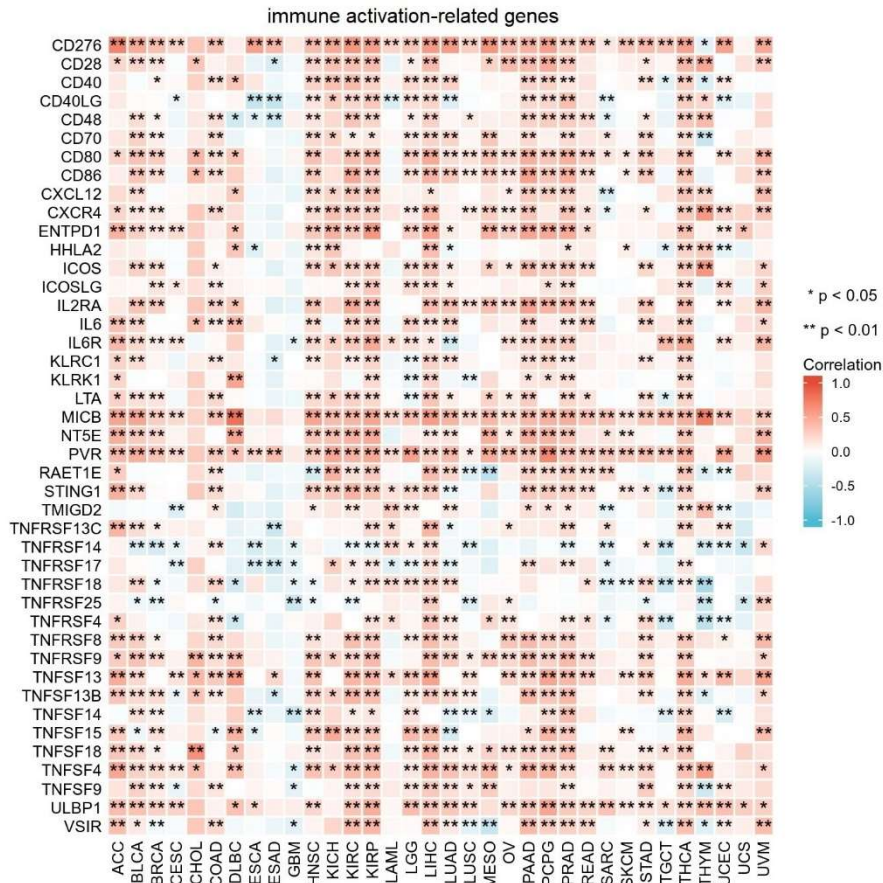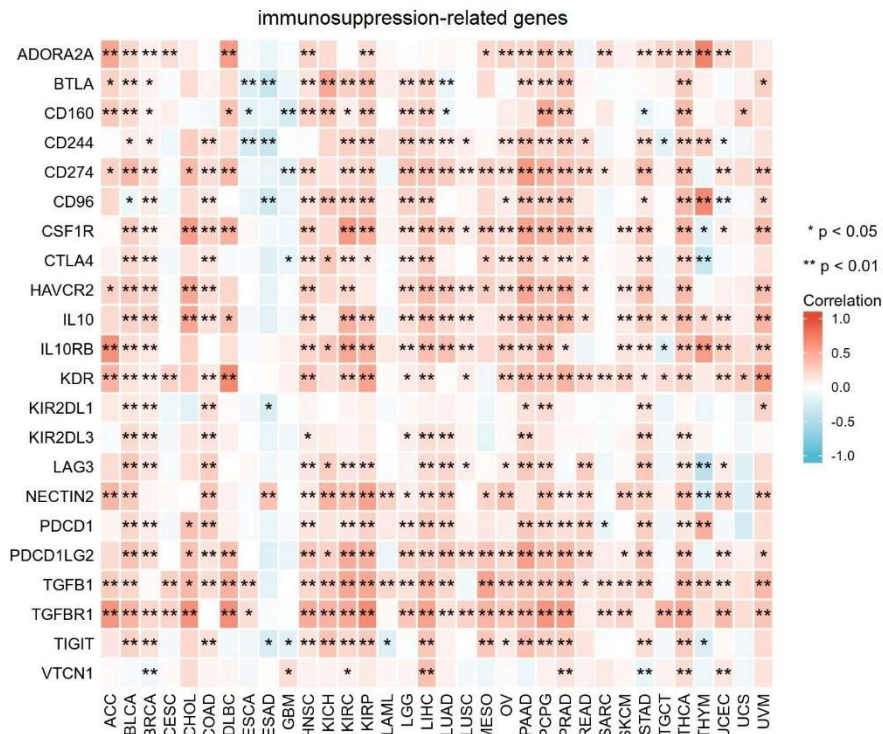

**Supplementary Figure S5.** Association between TUBA1B expression and immune-related genes in various cancers. **(A)** Co-expression of TUBA1B with immunoactivating ge

nes. **(B)** Co-expression of TUBA1B with immunosuppressive genes. (\*  $p < 0.05$ , \*\*  $p < 0.01$ )

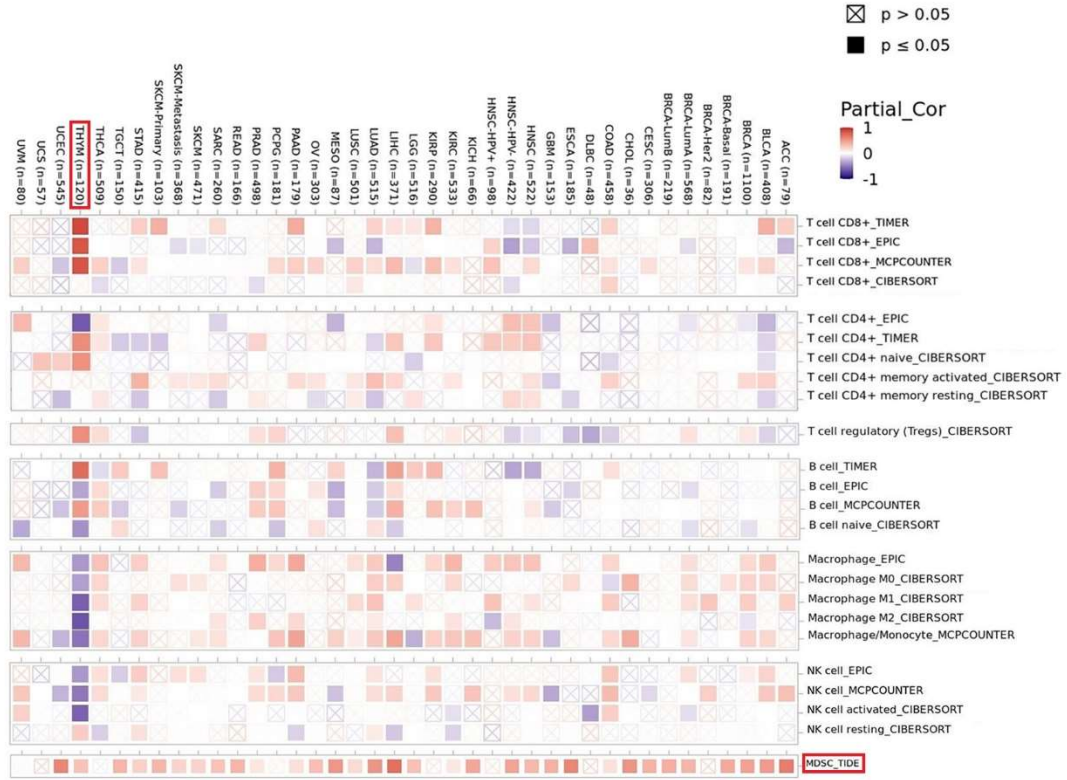

**Supplementary Figure S6.** Correlation analysis of TUBA1B expression with multiple immune cell infiltrates in pan-carcinogenesis.

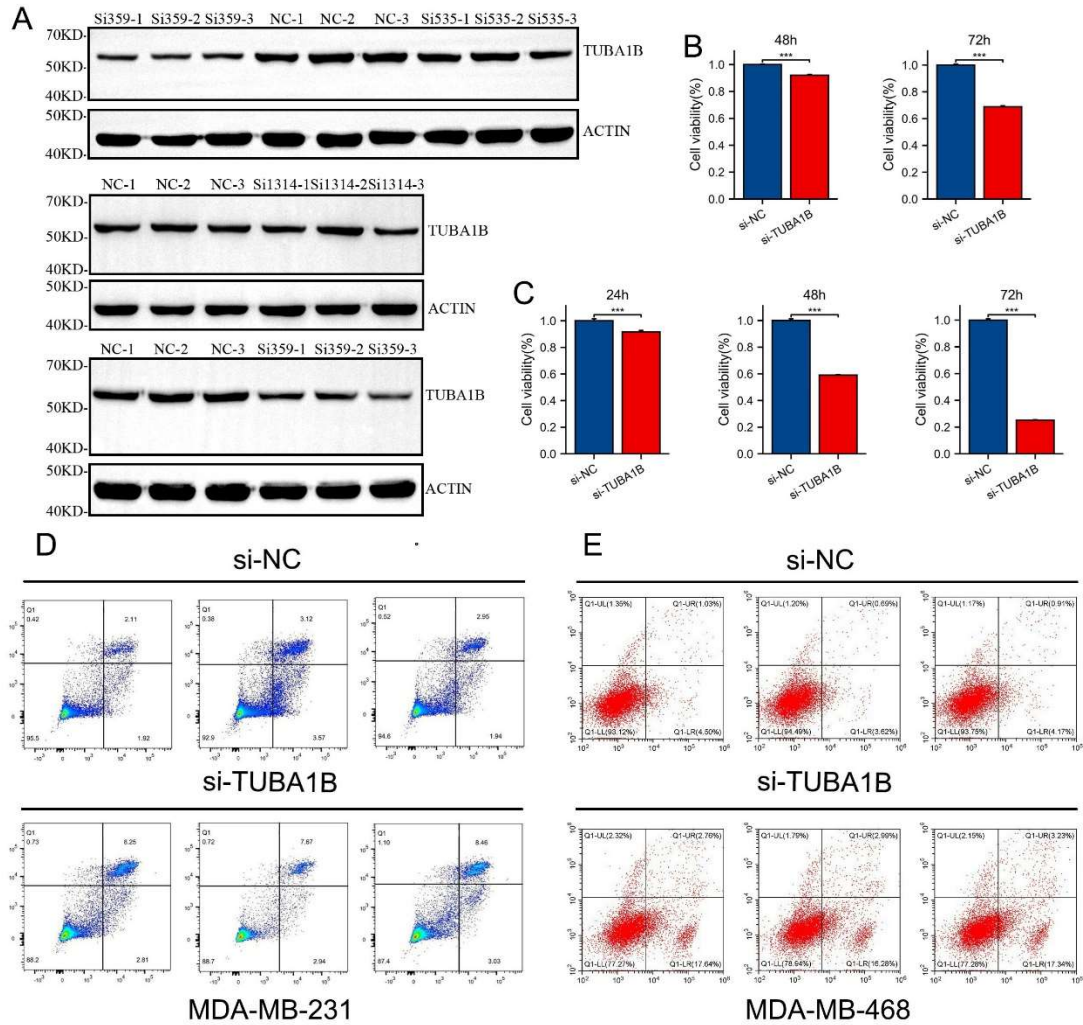

**Supplementary Figure S7.** Knockdown efficiency of TUBA1B and the effects on proliferation and apoptosis of breast cancer cells after TUBA1B knockdown. **(A)** Construction of TUBA1B knockdown vectors with siRNA-359, siRNA-535, and siRNA-1314. **(B-C)** Decreased viability of breast cancer cell lines after TUBA1B knockdown. **(D-E)** Flow cytometry analysis showing that knockdown of TUBA1B promoted apoptosis of breast cancer cell lines.

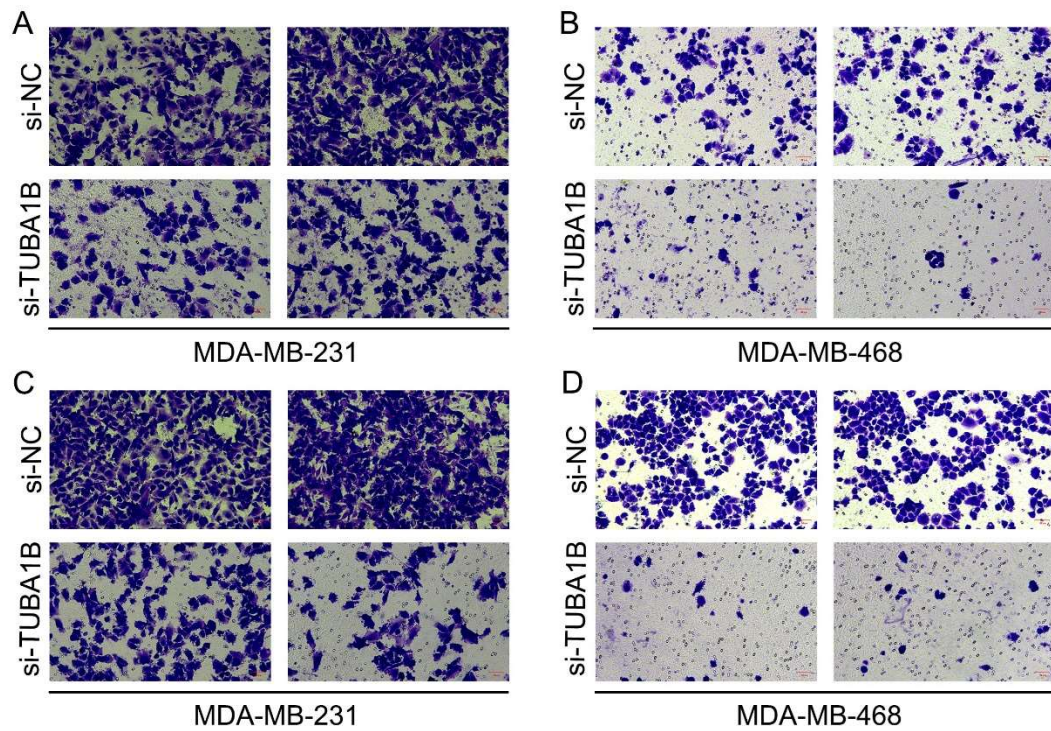

**Supplementary Figure S8.** Changes in the invasion and migration ability of breast cancer cells after TUBA1B knockdown. **(A-B)** Inhibition of invasion in breast cancer cell lines after TUBA1B knockdown. **(C-D)** Inhibition of metastasis in breast cancer cell lines after TUBA1B knockdown. (\*\*\*)  $p < 0.001$

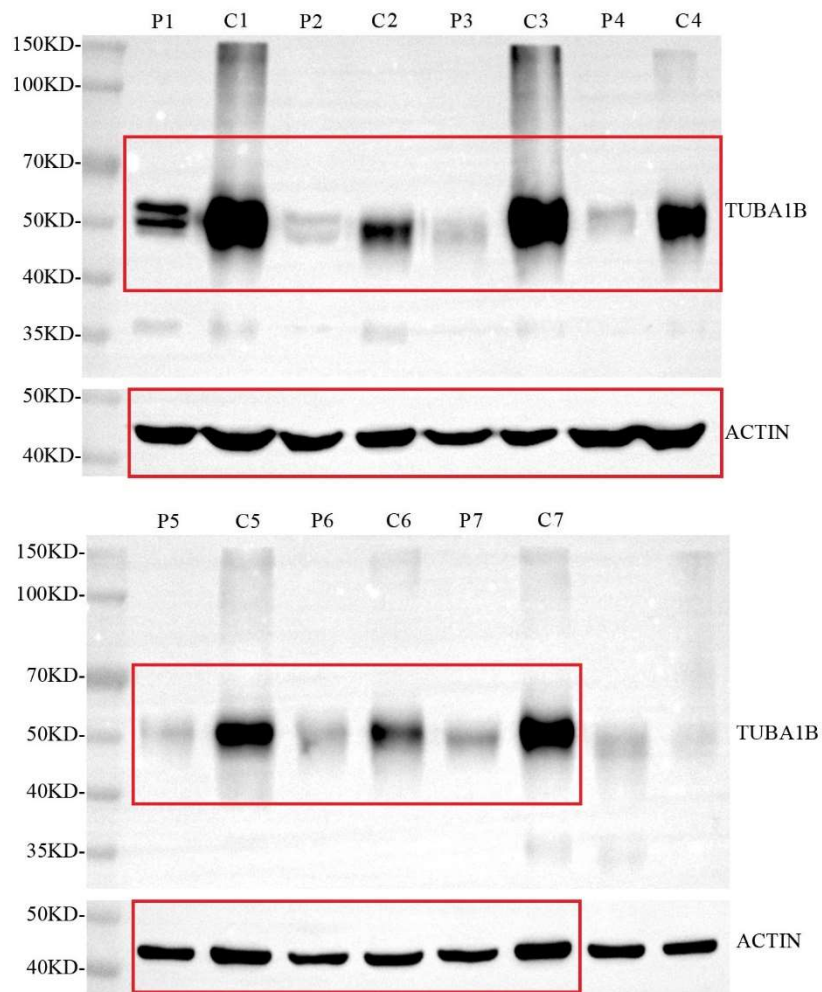

**Supplementary Figure S9.** Original blots of tissue validation.

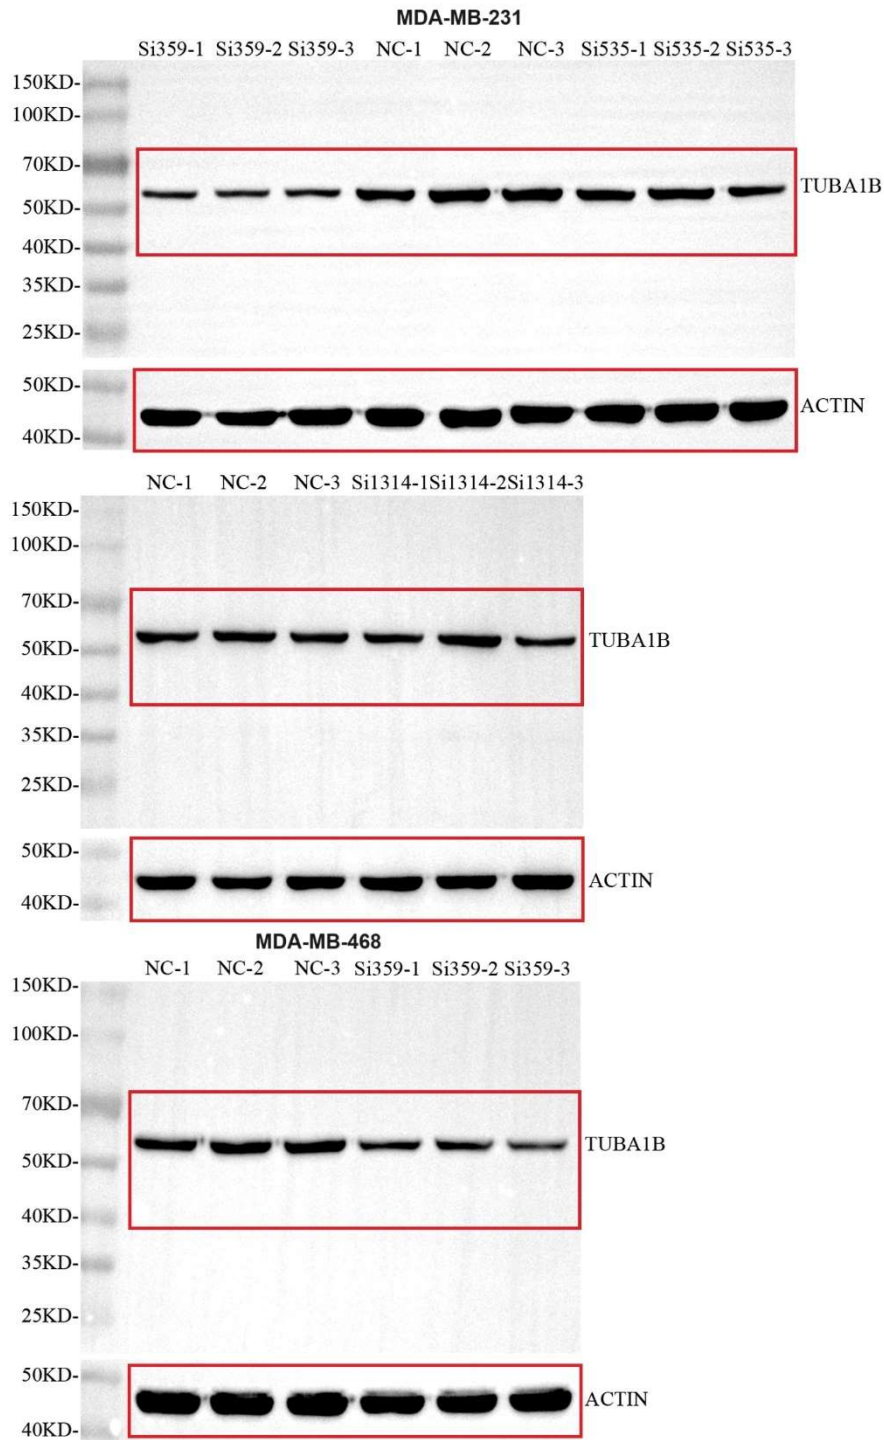

**Supplementary Figure S10.** Original blots of cell transfection efficiency assay.

**Supplementary Table S1.** Sequence information of the siRNA used.

| siRNA | sense (5'-3')             | antisense (5'-3')         |
|-------|---------------------------|---------------------------|
| si-NC | UUCUCCGAACGUGUCACG<br>UTT | ACGUGACACGUUCGGAG<br>AATT |

|                         |                           |                           |
|-------------------------|---------------------------|---------------------------|
| si-TUBA1B-Ho<br>mo-359  | CCCUGAGCAGCUCAUCAC<br>ATT | UGUGAUGAGCUGCUCAG<br>GGTT |
| si-TUBA1B-Ho<br>mo-535  | CUGGGUUCACCUCCCUGC<br>UTT | AGCAGGGAGGUGAACCC<br>AGTT |
| si-TUBA1B-Ho<br>mo-1314 | UGGUACGUGGGUGAGGG<br>GATT | UCCCCUCACCCACGUACC<br>ATT |

**Supplementary Table S2.** Results of univariate and multivariate Cox analysis of clinical parameters in ACC (A), BLCA (B), BRCA (C), KICH (D), LGG (E), LIHC (F), LUAD (G), MESO (H), SARC (I), and SKCM (J).

A. ACC

| Characteristics  | Total(N) | Univariate analysis   |         | Multivariate analysis |         |
|------------------|----------|-----------------------|---------|-----------------------|---------|
|                  |          | Hazard ratio (95% CI) | P value | Hazard ratio (95% CI) | P value |
| T stage          | 77       |                       |         |                       |         |
| T1&T2            | 51       | Reference             |         |                       |         |
| T3&T4            | 26       | 10.286 (3.976-26.608) | <0.001  | 6.886 (0.845-56.092)  | 0.071   |
| N stage          | 77       |                       |         |                       |         |
| N0               | 68       | Reference             |         |                       |         |
| N1               | 9        | 2.038 (0.769-5.400)   | 0.152   |                       |         |
| M stage          | 77       |                       |         |                       |         |
| M0               | 62       | Reference             |         |                       |         |
| M1               | 15       | 6.150 (2.710-13.959)  | <0.001  | 0.742 (0.205-2.678)   | 0.648   |
| Pathologic stage | 77       |                       |         |                       |         |

| Characteristics         | Total(N) | Univariate analysis   |         | Multivariate analysis |         |
|-------------------------|----------|-----------------------|---------|-----------------------|---------|
|                         |          | Hazard ratio (95% CI) | P value | Hazard ratio (95% CI) | P value |
| Stage I&Stage II        | 46       | Reference             |         |                       |         |
| Stage III&Stage IV      | 31       | 6.476 (2.706-15.498)  | <0.001  | 0.888 (0.085-9.230)   | 0.921   |
| Radiation therapy       | 76       |                       |         |                       |         |
| No                      | 59       | Reference             |         |                       |         |
| Yes                     | 17       | 1.292 (0.512-3.262)   | 0.587   |                       |         |
| Primary therapy outcome | 67       |                       |         |                       |         |
| PD&SD                   | 20       | Reference             |         |                       |         |
| PR&CR                   | 47       | 0.063 (0.020-0.199)   | <0.001  | 0.108 (0.028-0.420)   | 0.001   |
| Gender                  | 79       |                       |         |                       |         |
| Female                  | 48       | Reference             |         |                       |         |
| Male                    | 31       | 1.001 (0.469-2.137)   | 0.999   |                       |         |
| Age                     | 79       |                       |         |                       |         |
| <=50                    | 41       | Reference             |         |                       |         |
| >50                     | 38       | 1.799 (0.846-3.824)   | 0.127   |                       |         |
| TUBA1B                  | 79       |                       |         |                       |         |
| Low                     | 39       | Reference             |         |                       |         |

| Characteristics | Total(N) | Univariate analysis   |              | Multivariate analysis |         |
|-----------------|----------|-----------------------|--------------|-----------------------|---------|
|                 |          | Hazard ratio (95% CI) | P value      | Hazard ratio (95% CI) | P value |
| High            | 40       | 2.435 (1.120-5.293)   | <b>0.025</b> | 0.905 (0.315-2.601)   | 0.852   |

#### B. BLCA

| Characteristics  | Total(N) | Univariate analysis   |                  | Multivariate analysis |         |
|------------------|----------|-----------------------|------------------|-----------------------|---------|
|                  |          | Hazard ratio (95% CI) | P value          | Hazard ratio (95% CI) | P value |
| T stage          | 379      |                       |                  |                       |         |
| T1&T2            | 124      | Reference             |                  |                       |         |
| T3&T4            | 255      | 2.199 (1.515-3.193)   | <b>&lt;0.001</b> | 1.422 (0.428-4.726)   | 0.566   |
| N stage          | 369      |                       |                  |                       |         |
| N0&N1            | 285      | Reference             |                  |                       |         |
| N2&N3            | 84       | 2.273 (1.640-3.150)   | <b>&lt;0.001</b> | 1.791 (0.922-3.477)   | 0.085   |
| M stage          | 213      |                       |                  |                       |         |
| M0               | 202      | Reference             |                  |                       |         |
| M1               | 11       | 3.136 (1.503-6.544)   | <b>0.002</b>     | 0.756 (0.238-2.401)   | 0.635   |
| Pathologic stage | 411      |                       |                  |                       |         |
| Stage I&Stage II | 134      | Reference             |                  |                       |         |

| Characteristics         | Total(N) | Univariate analysis   |                  | Multivariate analysis |              |
|-------------------------|----------|-----------------------|------------------|-----------------------|--------------|
|                         |          | Hazard ratio (95% CI) | P value          | Hazard ratio (95% CI) | P value      |
| Stage III&Stage IV      | 277      | 2.310 (1.596-3.342)   | <b>&lt;0.001</b> | 1.323 (0.383-4.572)   | 0.658        |
| Primary therapy outcome | 357      |                       |                  |                       |              |
| PD&SD                   | 101      | Reference             |                  |                       |              |
| PR&CR                   | 256      | 0.226 (0.162-0.315)   | <b>&lt;0.001</b> | 0.382 (0.212-0.688)   | <b>0.001</b> |
| Age                     | 413      |                       |                  |                       |              |
| <=70                    | 233      | Reference             |                  |                       |              |
| >70                     | 180      | 1.421 (1.063-1.901)   | <b>0.018</b>     | 1.162 (0.696-1.940)   | 0.565        |
| Radiation therapy       | 387      |                       |                  |                       |              |
| No                      | 366      | Reference             |                  |                       |              |
| Yes                     | 21       | 0.965 (0.475-1.964)   | 0.923            |                       |              |
| Gender                  | 413      |                       |                  |                       |              |
| Female                  | 109      | Reference             |                  |                       |              |
| Male                    | 304      | 0.849 (0.616-1.169)   | 0.316            |                       |              |
| TUBA1B                  | 413      |                       |                  |                       |              |
| Low                     | 207      | Reference             |                  |                       |              |
| High                    | 206      | 1.359 (1.013-1.822)   | <b>0.041</b>     | 1.329 (0.786-2.245)   | 0.288        |

C. BRCA

| Characteristics    | Total(N) | Univariate analysis   |                  | Multivariate analysis |                  |
|--------------------|----------|-----------------------|------------------|-----------------------|------------------|
|                    |          | Hazard ratio (95% CI) | P value          | Hazard ratio (95% CI) | P value          |
| T stage            | 1079     |                       |                  |                       |                  |
| T1&T2              | 905      | Reference             |                  |                       |                  |
| T3&T4              | 174      | 1.608 (1.110-2.329)   | <b>0.012</b>     | 0.960 (0.537-1.717)   | 0.891            |
| N stage            | 1063     |                       |                  |                       |                  |
| N0                 | 514      | Reference             |                  |                       |                  |
| N1&N2&N3           | 549      | 2.239 (1.567-3.199)   | <b>&lt;0.001</b> | 1.418 (0.800-2.512)   | 0.232            |
| M stage            | 922      |                       |                  |                       |                  |
| M0                 | 902      | Reference             |                  |                       |                  |
| M1                 | 20       | 4.254 (2.468-7.334)   | <b>&lt;0.001</b> | 1.716 (0.758-3.884)   | 0.195            |
| Pathologic stage   | 1059     |                       |                  |                       |                  |
| Stage I&Stage II   | 799      | Reference             |                  |                       |                  |
| Stage III&Stage IV | 260      | 2.391 (1.703-3.355)   | <b>&lt;0.001</b> | 3.048 (1.525-6.092)   | <b>0.002</b>     |
| Age                | 1082     |                       |                  |                       |                  |
| <=60               | 601      | Reference             |                  |                       |                  |
| >60                | 481      | 2.020 (1.465-2.784)   | <b>&lt;0.001</b> | 2.391 (1.521-3.761)   | <b>&lt;0.001</b> |

| Characteristics   | Total(N) | Univariate analysis   |              | Multivariate analysis |                  |
|-------------------|----------|-----------------------|--------------|-----------------------|------------------|
|                   |          | Hazard ratio (95% CI) | P value      | Hazard ratio (95% CI) | P value          |
| radiation_therapy | 986      |                       |              |                       |                  |
| No                | 434      | Reference             |              |                       |                  |
| Yes               | 552      | 0.576 (0.394-0.841)   | <b>0.004</b> | 0.427 (0.267-0.683)   | <b>&lt;0.001</b> |
| TUBA1B            | 1082     |                       |              |                       |                  |
| Low               | 540      | Reference             |              |                       |                  |
| High              | 542      | 1.329 (0.965-1.829)   | 0.082        | 1.808 (1.158-2.825)   | <b>0.009</b>     |

#### D. KICH

| Characteristics | Total(N) | Univariate analysis   |              | Multivariate analysis |              |
|-----------------|----------|-----------------------|--------------|-----------------------|--------------|
|                 |          | Hazard ratio (95% CI) | P value      | Hazard ratio (95% CI) | P value      |
| T stage         | 64       |                       |              |                       |              |
| T1&T2           | 44       | Reference             |              |                       |              |
| T3&T4           | 20       | 10.121 (2.098-48.814) | <b>0.004</b> | 11.318 (2.239-57.208) | <b>0.003</b> |
| Gender          | 64       |                       |              |                       |              |
| Female          | 26       | Reference             |              |                       |              |
| Male            | 38       | 1.528 (0.381-6.125)   | 0.550        |                       |              |
| Age             | 64       |                       |              |                       |              |

| Characteristics | Total(N) | Univariate analysis   |              | Multivariate analysis |              |
|-----------------|----------|-----------------------|--------------|-----------------------|--------------|
|                 |          | Hazard ratio (95% CI) | P value      | Hazard ratio (95% CI) | P value      |
| <=50            | 33       | Reference             |              |                       |              |
| >50             | 31       | 3.847 (0.797-18.561)  | 0.093        | 2.374 (0.477-11.822)  | 0.291        |
| TUBA1B          | 64       |                       |              |                       |              |
| Low             | 32       | Reference             |              |                       |              |
| High            | 32       | 9.315 (1.164-74.548)  | <b>0.035</b> | 11.480 (1.397-94.329) | <b>0.023</b> |

#### E. LGG

| Characteristics         | Total(N) | Univariate analysis   |                  | Multivariate analysis |                  |
|-------------------------|----------|-----------------------|------------------|-----------------------|------------------|
|                         |          | Hazard ratio (95% CI) | P value          | Hazard ratio (95% CI) | P value          |
| WHO grade               | 466      |                       |                  |                       |                  |
| G2                      | 223      | Reference             |                  |                       |                  |
| G3                      | 243      | 3.059 (2.046-4.573)   | <b>&lt;0.001</b> | 2.696 (1.745-4.165)   | <b>&lt;0.001</b> |
| Primary therapy outcome | 457      |                       |                  |                       |                  |
| PD&SD                   | 256      | Reference             |                  |                       |                  |
| PR&CR                   | 201      | 0.202 (0.113-0.359)   | <b>&lt;0.001</b> | 0.243 (0.129-0.458)   | <b>&lt;0.001</b> |
| Age                     | 527      |                       |                  |                       |                  |
| <=40                    | 264      | Reference             |                  |                       |                  |

| Characteristics | Total(N) | Univariate analysis   |                  | Multivariate analysis |                  |
|-----------------|----------|-----------------------|------------------|-----------------------|------------------|
|                 |          | Hazard ratio (95% CI) | P value          | Hazard ratio (95% CI) | P value          |
| >40             | 263      | 2.889 (2.009-4.155)   | <b>&lt;0.001</b> | 2.902 (1.884-4.470)   | <b>&lt;0.001</b> |
| Gender          | 527      |                       |                  |                       |                  |
| Female          | 238      | Reference             |                  |                       |                  |
| Male            | 289      | 1.124 (0.800-1.580)   | 0.499            |                       |                  |
| TUBA1B          | 527      |                       |                  |                       |                  |
| Low             | 264      | Reference             |                  |                       |                  |
| High            | 263      | 1.907 (1.335-2.723)   | <b>&lt;0.001</b> | 1.653 (1.076-2.538)   | <b>0.022</b>     |

#### F. LIHC

| Characteristics | Total(N) | Univariate analysis   |                  | Multivariate analysis |         |
|-----------------|----------|-----------------------|------------------|-----------------------|---------|
|                 |          | Hazard ratio (95% CI) | P value          | Hazard ratio (95% CI) | P value |
| T stage         | 370      |                       |                  |                       |         |
| T1&T2           | 277      | Reference             |                  |                       |         |
| T3&T4           | 93       | 2.598 (1.826-3.697)   | <b>&lt;0.001</b> | 1.861 (0.254-13.626)  | 0.541   |
| N stage         | 258      |                       |                  |                       |         |
| N0              | 254      | Reference             |                  |                       |         |
| N1              | 4        | 2.029 (0.497-8.281)   | 0.324            |                       |         |

| Characteristics  | Total(N) | Univariate analysis   |                  | Multivariate analysis |         |
|------------------|----------|-----------------------|------------------|-----------------------|---------|
|                  |          | Hazard ratio (95% CI) | P value          | Hazard ratio (95% CI) | P value |
| Pathologic stage | 349      |                       |                  |                       |         |
| Stage I          | 173      | Reference             |                  |                       |         |
| Stage II         | 86       | 1.417 (0.868-2.312)   | 0.164            | 1.355 (0.828-2.216)   | 0.227   |
| Stage III        | 85       | 2.734 (1.792-4.172)   | <b>&lt;0.001</b> | 1.418 (0.192-10.442)  | 0.732   |
| Stage IV         | 5        | 5.597 (1.726-18.148)  | <b>0.004</b>     | 3.489 (0.351-34.731)  | 0.286   |
| Gender           | 373      |                       |                  |                       |         |
| Female           | 121      | Reference             |                  |                       |         |
| Male             | 252      | 0.793 (0.557-1.130)   | 0.200            |                       |         |
| Age              | 373      |                       |                  |                       |         |
| ≤60              | 177      | Reference             |                  |                       |         |
| >60              | 196      | 1.205 (0.850-1.708)   | 0.295            |                       |         |
| TUBA1B           | 373      |                       |                  |                       |         |
| Low              | 187      | Reference             |                  |                       |         |
| High             | 186      | 1.479 (1.047-2.090)   | <b>0.027</b>     | 1.399 (0.958-2.042)   | 0.082   |

G. LUAD

| Characteristics    | Total(N) | Univariate analysis   |                  | Multivariate analysis |              |
|--------------------|----------|-----------------------|------------------|-----------------------|--------------|
|                    |          | Hazard ratio (95% CI) | P value          | Hazard ratio (95% CI) | P value      |
| T stage            | 523      |                       |                  |                       |              |
| T1                 | 175      | Reference             |                  |                       |              |
| T2                 | 282      | 1.521 (1.068-2.166)   | <b>0.020</b>     | 1.417 (0.865-2.321)   | 0.166        |
| T3&T4              | 66       | 3.066 (1.950-4.823)   | <b>&lt;0.001</b> | 1.922 (0.947-3.902)   | 0.070        |
| N stage            | 510      |                       |                  |                       |              |
| N0                 | 343      | Reference             |                  |                       |              |
| N1&N2&N3           | 167      | 2.601 (1.944-3.480)   | <b>&lt;0.001</b> | 1.602 (1.014-2.533)   | <b>0.044</b> |
| M stage            | 377      |                       |                  |                       |              |
| M0                 | 352      | Reference             |                  |                       |              |
| M1                 | 25       | 2.136 (1.248-3.653)   | <b>0.006</b>     | 1.248 (0.517-3.013)   | 0.622        |
| Pathologic stage   | 518      |                       |                  |                       |              |
| Stage I&Stage II   | 411      | Reference             |                  |                       |              |
| Stage III&Stage IV | 107      | 2.664 (1.960-3.621)   | <b>&lt;0.001</b> | 1.470 (0.814-2.654)   | 0.201        |
| Gender             | 526      |                       |                  |                       |              |
| Female             | 280      | Reference             |                  |                       |              |
| Male               | 246      | 1.070 (0.803-1.426)   | 0.642            |                       |              |

| Characteristics         | Total(N) | Univariate analysis   |                  | Multivariate analysis |                  |
|-------------------------|----------|-----------------------|------------------|-----------------------|------------------|
|                         |          | Hazard ratio (95% CI) | P value          | Hazard ratio (95% CI) | P value          |
| Age                     | 516      |                       |                  |                       |                  |
| <=65                    | 255      | Reference             |                  |                       |                  |
| >65                     | 261      | 1.223 (0.916-1.635)   | 0.172            |                       |                  |
| Primary therapy outcome | 439      |                       |                  |                       |                  |
| PD&SD                   | 108      | Reference             |                  |                       |                  |
| PR&CR                   | 331      | 0.377 (0.268-0.530)   | <b>&lt;0.001</b> | 0.376 (0.249-0.567)   | <b>&lt;0.001</b> |
| TUBA1B                  | 526      |                       |                  |                       |                  |
| Low                     | 264      | Reference             |                  |                       |                  |
| High                    | 262      | 1.732 (1.293-2.320)   | <b>&lt;0.001</b> | 1.576 (1.041-2.385)   | <b>0.031</b>     |

#### H. MESO

| Characteristics | Total(N) | Univariate analysis   |         | Multivariate analysis |         |
|-----------------|----------|-----------------------|---------|-----------------------|---------|
|                 |          | Hazard ratio (95% CI) | P value | Hazard ratio (95% CI) | P value |
| T stage         | 83       |                       |         |                       |         |
| T1&T2           | 39       | Reference             |         |                       |         |
| T3&T4           | 44       | 0.955 (0.590-1.547)   | 0.852   |                       |         |
| N stage         | 81       |                       |         |                       |         |

| Characteristics    | Total(N) | Univariate analysis   |         | Multivariate analysis |         |
|--------------------|----------|-----------------------|---------|-----------------------|---------|
|                    |          | Hazard ratio (95% CI) | P value | Hazard ratio (95% CI) | P value |
| N0                 | 43       | Reference             |         |                       |         |
| N1&N2&N3           | 38       | 0.904 (0.557-1.467)   | 0.683   |                       |         |
| M stage            | 59       |                       |         |                       |         |
| M0                 | 56       | Reference             |         |                       |         |
| M1                 | 3        | 1.917 (0.454-8.089)   | 0.376   |                       |         |
| Pathologic stage   | 85       |                       |         |                       |         |
| Stage I&Stage II   | 26       | Reference             |         |                       |         |
| Stage III&Stage IV | 59       | 0.974 (0.577-1.647)   | 0.923   |                       |         |
| Radiation therapy  | 84       |                       |         |                       |         |
| No                 | 59       | Reference             |         |                       |         |
| Yes                | 25       | 0.693 (0.409-1.176)   | 0.174   |                       |         |
| Gender             | 85       |                       |         |                       |         |
| Female             | 15       | Reference             |         |                       |         |
| Male               | 70       | 0.944 (0.516-1.726)   | 0.850   |                       |         |
| Age                | 85       |                       |         |                       |         |
| <=65               | 46       | Reference             |         |                       |         |

| Characteristics | Total(N) | Univariate analysis   |                  | Multivariate analysis |                  |
|-----------------|----------|-----------------------|------------------|-----------------------|------------------|
|                 |          | Hazard ratio (95% CI) | P value          | Hazard ratio (95% CI) | P value          |
| >65             | 39       | 1.296 (0.805-2.085)   | 0.286            |                       |                  |
| TUBA1B          | 85       |                       |                  |                       |                  |
| Low             | 42       | Reference             |                  |                       |                  |
| High            | 43       | 2.689 (1.653-4.373)   | <b>&lt;0.001</b> | 2.689 (1.653-4.373)   | <b>&lt;0.001</b> |

#### I. SARC

| Characteristics   | Total(N) | Univariate analysis   |         | Multivariate analysis |         |
|-------------------|----------|-----------------------|---------|-----------------------|---------|
|                   |          | Hazard ratio (95% CI) | P value | Hazard ratio (95% CI) | P value |
| Radiation therapy | 257      |                       |         |                       |         |
| No                | 179      | Reference             |         |                       |         |
| Yes               | 78       | 0.864 (0.557-1.339)   | 0.513   |                       |         |
| Gender            | 263      |                       |         |                       |         |
| Female            | 144      | Reference             |         |                       |         |
| Male              | 119      | 0.905 (0.607-1.349)   | 0.623   |                       |         |
| Age               | 263      |                       |         |                       |         |
| <=60              | 130      | Reference             |         |                       |         |
| >60               | 133      | 1.285 (0.864-1.911)   | 0.216   |                       |         |

| Characteristics  | Total(N) | Univariate analysis   |                  | Multivariate analysis |                  |
|------------------|----------|-----------------------|------------------|-----------------------|------------------|
|                  |          | Hazard ratio (95% CI) | P value          | Hazard ratio (95% CI) | P value          |
| Residual tumor   | 235      |                       |                  |                       |                  |
| R0               | 157      | Reference             |                  |                       |                  |
| R1               | 69       | 2.255 (1.437-3.538)   | <b>&lt;0.001</b> | 2.115 (1.142-3.916)   | <b>0.017</b>     |
| R2               | 9        | 11.328 (5.225-24.561) | <b>&lt;0.001</b> | 15.315 (5.170-45.368) | <b>&lt;0.001</b> |
| Metastasis       | 179      |                       |                  |                       |                  |
| No               | 120      | Reference             |                  |                       |                  |
| Yes              | 59       | 2.888 (1.762-4.732)   | <b>&lt;0.001</b> | 2.377 (1.360-4.155)   | <b>0.002</b>     |
| Tumor multifocal | 239      |                       |                  |                       |                  |
| No               | 199      | Reference             |                  |                       |                  |
| Yes              | 40       | 2.402 (1.502-3.840)   | <b>&lt;0.001</b> | 1.116 (0.484-2.574)   | 0.797            |
| TUBA1B           | 263      |                       |                  |                       |                  |
| Low              | 131      | Reference             |                  |                       |                  |
| High             | 132      | 1.764 (1.173-2.652)   | <b>0.006</b>     | 1.716 (0.965-3.052)   | 0.066            |

| Characteristics    | Total(N) | Univariate analysis   |                  | Multivariate analysis |                  |
|--------------------|----------|-----------------------|------------------|-----------------------|------------------|
|                    |          | Hazard ratio (95% CI) | P value          | Hazard ratio (95% CI) | P value          |
| T stage            | 361      |                       |                  |                       |                  |
| T1                 | 41       | Reference             |                  |                       |                  |
| T2                 | 77       | 1.495 (0.811-2.756)   | 0.197            | 1.739 (0.882-3.426)   | 0.110            |
| T3                 | 90       | 2.097 (1.158-3.798)   | <b>0.015</b>     | 2.094 (1.068-4.103)   | <b>0.031</b>     |
| T4                 | 153      | 3.711 (2.070-6.653)   | <b>&lt;0.001</b> | 4.522 (2.307-8.866)   | <b>&lt;0.001</b> |
| N stage            | 402      |                       |                  |                       |                  |
| N0                 | 224      | Reference             |                  |                       |                  |
| N1                 | 73       | 1.497 (1.014-2.210)   | <b>0.043</b>     | 2.911 (0.997-8.496)   | 0.051            |
| N2                 | 49       | 1.534 (0.972-2.419)   | 0.066            | 3.071 (1.018-9.260)   | <b>0.046</b>     |
| N3                 | 56       | 2.731 (1.769-4.215)   | <b>&lt;0.001</b> | 7.113 (2.355-21.480)  | <b>&lt;0.001</b> |
| M stage            | 430      |                       |                  |                       |                  |
| M0                 | 406      | Reference             |                  |                       |                  |
| M1                 | 24       | 1.897 (1.029-3.496)   | <b>0.040</b>     | 1.688 (0.690-4.132)   | 0.252            |
| Pathologic stage   | 410      |                       |                  |                       |                  |
| Stage I&Stage II   | 217      | Reference             |                  |                       |                  |
| Stage III&Stage IV | 193      | 1.617 (1.207-2.165)   | <b>0.001</b>     | 0.518 (0.183-1.464)   | 0.215            |

| Characteristics   | Total(N) | Univariate analysis   |                  | Multivariate analysis |         |
|-------------------|----------|-----------------------|------------------|-----------------------|---------|
|                   |          | Hazard ratio (95% CI) | P value          | Hazard ratio (95% CI) | P value |
| Radiation therapy | 450      |                       |                  |                       |         |
| No                | 374      | Reference             |                  |                       |         |
| Yes               | 76       | 0.977 (0.694-1.377)   | 0.895            |                       |         |
| Gender            | 456      |                       |                  |                       |         |
| Female            | 172      | Reference             |                  |                       |         |
| Male              | 284      | 1.172 (0.879-1.563)   | 0.281            |                       |         |
| Age               | 456      |                       |                  |                       |         |
| ≤60               | 246      | Reference             |                  |                       |         |
| >60               | 210      | 1.656 (1.251-2.192)   | <b>&lt;0.001</b> | 1.107 (0.790-1.551)   | 0.555   |
| TUBA1B            | 456      |                       |                  |                       |         |
| Low               | 227      | Reference             |                  |                       |         |
| High              | 229      | 1.329 (1.015-1.740)   | <b>0.039</b>     | 1.321 (0.955-1.828)   | 0.093   |

**Supplementary Table S3.** List of the top 100 genes associated with TUBA1B.

**Supplementary Table S4.** GO terms and KEGG pathways enriched in the analysis.
