# Supplementary material for: Tubulin alpha-1b chain was identified as a prognosis and immune biomarker in pan-cancer combing with experimental validation in breast cancer
Source: Sci Rep. 2024 Apr 8;14:8201. doi: 10.1038/s41598-024-58982-z (PMC11001892; doi:10.1038/s41598-024-58982-z)
Supplement: Supplementary file 2 — Supplementary Table 3. [file 41598_2024_58982_MOESM2_ESM.xlsx]

## Sheet: Sheet 1
ONTOLOGY	ID	Description	GeneRatio		GeneRatio	BgRatio	pvalue	p.adjust	qvalue	geneID	Count
BP	GO:0010498	proteasomal protein catabolic process	10	122	0.0819672	477/18670	0.00115948	0.00861388	0.0066543	CCNB1/CCNF/CDK1/MAD2L1/PLK1/PSMB2/AURKB/PSMD14/FBXO5/UBE2S	10
BP	GO:1904951	positive regulation of establishment of protein localization	10	122	0.0819672	456/18670	0.000825134	0.00642544	0.00496371	CCT6A/KIF5B/PRNP/RAN/TCP1/YWHAZ/SAE1/CCT2/GTSE1/CENPJ	10
BP	GO:0043161	proteasome-mediated ubiquitin-dependent protein catabolic process	10	122	0.0819672	419/18670	0.000429355	0.00375009	0.00289698	CCNB1/CCNF/CDK1/MAD2L1/PLK1/PSMB2/AURKB/PSMD14/FBXO5/UBE2S	10
BP	GO:0032984	protein-containing complex disassembly	10	122	0.0819672	329/18670	6.0684e-05	0.000668558	0.000516467	CFL1/KIF2A/KIF5B/STMN1/CKAP5/HDAC6/CKAP2/STMN4/KIF18B/CAMSAP1	10
BP	GO:0045931	positive regulation of mitotic cell cycle	10	122	0.0819672	163/18670	1.1612e-07	2.5586e-06	1.97654e-06	CCNB1/CDK1/MAD2L1/CDC7/DLGAP5/NDC80/FBXO5/NUSAP1/CDT1/CDCA5	10
BP	GO:0031570	DNA integrity checkpoint	10	122	0.0819672	157/18670	8.15669e-08	1.83905e-06	1.42068e-06	CCNB1/CDK1/CHEK1/PCNA/PLK1/TIMELESS/GTSE1/CLSPN/WDR76/CDT1	10
BP	GO:0006275	regulation of DNA replication	10	122	0.0819672	108/18670	2.20678e-09	7.77991e-08	6.01005e-08	CCNA2/CDK1/PCNA/RFC2/RFC5/CDC7/TIMELESS/FBXO5/CACYBP/CDT1	10
BP	GO:0033045	regulation of sister chromatid segregation	10	122	0.0819672	80/18670	1.09369e-10	4.8197e-09	3.72326e-09	CCNB1/FEN1/MAD2L1/PLK1/AURKB/DLGAP5/NDC80/FBXO5/CDT1/CDCA5	10
BP	GO:0046785	microtubule polymerization	10	122	0.0819672	76/18670	6.48081e-11	3.14157e-09	2.42689e-09	STMN1/MAPT/CLIP1/SNCA/CKAP5/TUBGCP2/MAPRE3/FBXO5/CENPJ/CAMSAP1	10
BP	GO:0016569	covalent chromatin modification	11	122	0.0901639	474/18670	0.000280403	0.00258906	0.00200007	CCNA2/CCNB1/CDK1/CHEK1/SNCA/SUV39H1/AURKB/HDAC6/PWP1/UHRF1/POLE3	11
MF	GO:0004521	endoribonuclease activity	3	122	0.0245902	64/17697	0.00981097	0.0463082	0.0339099	FEN1/EXO1/RNASEH2A	3
MF	GO:0003684	damaged DNA binding	3	122	0.0245902	65/17697	0.0102348	0.0463082	0.0339099	FEN1/PCNA/DCLRE1B	3
MF	GO:0035064	methylated histone binding	3	122	0.0245902	65/17697	0.0102348	0.0463082	0.0339099	PWP1/UHRF1/NCAPG2	3
MF	GO:0140034	methylation-dependent protein binding	3	122	0.0245902	65/17697	0.0102348	0.0463082	0.0339099	PWP1/UHRF1/NCAPG2	3
BP	GO:0016570	histone modification	11	122	0.0901639	454/18670	0.000193697	0.00189522	0.00146407	CCNA2/CCNB1/CDK1/CHEK1/SNCA/SUV39H1/AURKB/HDAC6/PWP1/UHRF1/POLE3	11
MF	GO:0031072	heat shock protein binding	4	122	0.0327869	119/17697	0.00928908	0.0449787	0.0329364	CDK1/MAPT/SNCA/HDAC6	4
MF	GO:0070840	dynein complex binding	2	122	0.0163934	21/17697	0.0090861	0.0447815	0.032792	SNCA/HDAC6	2
BP	GO:0006310	DNA recombination	11	122	0.0901639	292/18670	3.42149e-06	5.22383e-05	4.03545e-05	CHEK1/FEN1/KPNA2/MCM2/MCM3/MCM6/CDC7/TIMELESS/EXO1/PSMD14/NABP2	11
BP	GO:0071824	protein-DNA complex subunit organization	11	122	0.0901639	288/18670	2.99689e-06	4.61189e-05	3.56272e-05	CENPA/CENPI/MCM2/MCM3/MCM6/CHAF1B/POLE3/HJURP/CENPO/CDT1/CENPL	11
BP	GO:0051258	protein polymerization	11	122	0.0901639	283/18670	2.53161e-06	4.09065e-05	3.16007e-05	STMN1/MAPT/CLIP1/SNCA/CKAP5/TUBGCP2/MAPRE3/FBXO5/UBE2S/CENPJ/CAMSAP1	11
MF	GO:0042288	MHC class I protein binding	2	122	0.0163934	20/17697	0.00825774	0.0414388	0.0303442	TUBB4B/TUBB	2
KEGG	hsa05203	Viral carcinogenesis	5	59	0.0847458	204/8076	0.0162557	0.0480282	0.0303336	CCNA2/CDK1/CHEK1/YWHAZ/HDAC6	5
MF	GO:0004536	deoxyribonuclease activity	3	122	0.0245902	59/17697	0.00784766	0.0412134	0.0301791	FEN1/EXO1/DCLRE1B	3
MF	GO:0004540	ribonuclease activity	4	122	0.0327869	114/17697	0.00801287	0.0412134	0.0301791	FEN1/PPP1R8/EXO1/RNASEH2A	4
MF	GO:0045296	cadherin binding	7	122	0.057377	331/17697	0.00806348	0.0412134	0.0301791	KIF5B/RAN/TMPO/YWHAZ/CCNB2/CKAP5/TXNDC9	7
BP	GO:0065004	protein-DNA complex assembly	11	122	0.0901639	248/18670	6.97798e-07	1.31362e-05	1.01478e-05	CENPA/CENPI/MCM2/MCM3/MCM6/CHAF1B/POLE3/HJURP/CENPO/CDT1/CENPL	11
BP	GO:0051983	regulation of chromosome segregation	11	122	0.0901639	103/18670	7.05107e-11	3.33464e-09	2.57604e-09	CCNB1/FEN1/MAD2L1/PLK1/AURKB/DLGAP5/NDC80/FBXO5/RACGAP1/CDT1/CDCA5	11
BP	GO:0034502	protein localization to chromosome	11	122	0.0901639	82/18670	5.55303e-12	3.58911e-10	2.77262e-10	CCT6A/CDK1/CENPA/PLK1/TCP1/AURKB/NDC80/CCT2/NABP2/CDT1/CDCA5	11
BP	GO:0031110	regulation of microtubule polymerization or depolymerization	11	122	0.0901639	79/18670	3.64314e-12	2.43588e-10	1.88174e-10	STMN1/MAPT/CLIP1/SNCA/HDAC6/MAPRE3/CKAP2/STMN4/CAMSAP1/SKA1/SKA2	11
BP	GO:0007018	microtubule-based movement	12	122	0.0983607	283/18670	3.43809e-07	7.01733e-06	5.42095e-06	KIF2A/KIF5B/KIF11/KIFC1/MAPT/KIF23/DLGAP5/HDAC6/KIF20A/KIF4A/RACGAP1/KIF18B	12
BP	GO:0072331	signal transduction by p53 class mediator	12	122	0.0983607	267/18670	1.84003e-07	3.92067e-06	3.02875e-06	CCNB1/CDK1/CHEK1/FOXM1/PCNA/RFC2/RFC5/SSRP1/EXO1/AURKB/TPX2/GTSE1	12
BP	GO:0006302	double-strand break repair	12	122	0.0983607	248/18670	8.25677e-08	1.84022e-06	1.42158e-06	CHEK1/FEN1/FOXM1/MCM2/MCM3/MCM6/CDC7/TIMELESS/PSMD14/DCLRE1B/NABP2/CDCA5	12
MF	GO:0016796	exonuclease activity, active with either ribo- or deoxyribonucleic acids and producing 5'-phosphomonoesters	3	122	0.0245902	57/17697	0.00713395	0.0386073	0.0282708	FEN1/EXO1/DCLRE1B	3
CC	GO:0005635	nuclear envelope	9	124	0.0725806	464/19717	0.00267463	0.0131592	0.00957235	LMNB1/MAD2L1/PRNP/RAN/CLIP1/SNCA/TMPO/CACYBP/TUBB	9
CC	GO:0061695	transferase complex, transferring phosphorus-containing groups	9	124	0.0725806	259/19717	3.86361e-05	0.000279544	0.000203348	CCNA2/CCNB1/CCNF/CDK1/MCM3/PCNA/PRIM1/CCNB2/POLE3	9
BP	GO:0051783	regulation of nuclear division	12	122	0.0983607	188/18670	3.78123e-09	1.16378e-07	8.99029e-08	CCNB1/CHEK1/KIF11/MAD2L1/PLK1/AURKB/DLGAP5/NDC80/FBXO5/NUSAP1/CDT1/CDCA5	12
CC	GO:0000781	chromosome, telomeric region	9	124	0.0725806	161/19717	8.21156e-07	9.18202e-06	6.67926e-06	CDK1/CHEK1/FEN1/MCM2/MCM3/MCM6/PCNA/DCLRE1B/NABP2	9
CC	GO:0033267	axon part	8	124	0.0645161	382/19717	0.00288933	0.0138354	0.0100643	KIF5B/MAPT/SNCA/HNRNPR/TUBB3/TPX2/KIF4A/STMN4	8
CC	GO:0044450	microtubule organizing center part	8	124	0.0645161	185/19717	2.24916e-05	0.000184431	0.000134161	CCNF/KIF2A/PLK1/RAN/TCP1/CKAP5/TUBGCP2/CENPJ	8
BP	GO:0007088	regulation of mitotic nuclear division	12	122	0.0983607	164/18670	7.93493e-10	3.07717e-08	2.37714e-08	CCNB1/CHEK1/KIF11/MAD2L1/PLK1/AURKB/DLGAP5/NDC80/FBXO5/NUSAP1/CDT1/CDCA5	12
BP	GO:0000281	mitotic cytokinesis	12	122	0.0983607	73/18670	4.58421e-14	4.23275e-12	3.26984e-12	CENPA/CFL1/INCENP/STMN1/PLK1/KIF23/KIF20A/KIF4A/CKAP2/RACGAP1/NUSAP1/CDT1	12
BP	GO:0033260	nuclear DNA replication	12	122	0.0983607	60/18670	3.74587e-15	4.53953e-13	3.50683e-13	FEN1/MCM2/MCM3/MCM6/PCNA/PRIM1/RFC2/RFC5/CDC7/GINS1/POLE3/CDT1	12
BP	GO:0060249	anatomical structure homeostasis	13	122	0.106557	437/18670	5.75436e-06	8.08529e-05	6.24596e-05	CCT6A/FEN1/PCNA/PRIM1/RFC2/RFC5/TCP1/EXO1/AURKB/CCT2/POLE3/DCLRE1B/NABP2	13
BP	GO:1901991	negative regulation of mitotic cell cycle phase transition	13	122	0.106557	248/18670	8.91445e-09	2.43452e-07	1.88069e-07	CCNB1/CDK1/MAD2L1/PCNA/PLK1/PSMB2/AURKB/PSMD14/NDC80/FBXO5/GTSE1/CLSPN/CDT1	13
BP	GO:0032200	telomere organization	13	122	0.106557	175/18670	1.24581e-10	5.36805e-09	4.14686e-09	CCT6A/FEN1/PCNA/PRIM1/RFC2/RFC5/TCP1/EXO1/AURKB/CCT2/POLE3/DCLRE1B/NABP2	13
BP	GO:0007093	mitotic cell cycle checkpoint	13	122	0.106557	165/18670	5.95123e-11	2.95883e-09	2.28572e-09	CCNB1/CDK1/MAD2L1/PCNA/PLK1/AURKB/NDC80/ZWINT/GTSE1/CLSPN/DCLRE1B/NABP2/CDT1	13
BP	GO:0000723	telomere maintenance	13	122	0.106557	162/18670	4.72185e-11	2.40939e-09	1.86127e-09	CCT6A/FEN1/PCNA/PRIM1/RFC2/RFC5/TCP1/EXO1/AURKB/CCT2/POLE3/DCLRE1B/NABP2	13
CC	GO:0000784	nuclear chromosome, telomeric region	8	124	0.0645161	125/19717	1.24008e-06	1.27108e-05	9.24623e-06	CDK1/FEN1/MCM2/MCM3/MCM6/PCNA/DCLRE1B/NABP2	8
BP	GO:0061640	cytoskeleton-dependent cytokinesis	13	122	0.106557	100/18670	9.08095e-14	7.04318e-12	5.44092e-12	CENPA/CFL1/INCENP/STMN1/PLK1/AURKB/KIF23/KIF20A/KIF4A/CKAP2/RACGAP1/NUSAP1/CDT1	13
BP	GO:0044786	cell cycle DNA replication	13	122	0.106557	71/18670	8.69074e-16	1.12342e-13	8.67854e-14	FEN1/MCM2/MCM3/MCM6/PCNA/PRIM1/RFC2/RFC5/CDC7/GINS1/FBXO5/POLE3/CDT1	13
BP	GO:1903829	positive regulation of cellular protein localization	14	122	0.114754	324/18670	2.69107e-08	6.60505e-07	5.10246e-07	CCT6A/CDK1/KIF5B/MAPT/PLK1/PRNP/RAN/TCP1/YWHAZ/SAE1/NDC80/CCT2/GTSE1/CDT1	14
BP	GO:1901988	negative regulation of cell cycle phase transition	14	122	0.114754	267/18670	2.29924e-09	7.9611e-08	6.15002e-08	CCNB1/CDK1/CHEK1/MAD2L1/PCNA/PLK1/PSMB2/AURKB/PSMD14/NDC80/FBXO5/GTSE1/CLSPN/CDT1	14
MF	GO:0005521	lamin binding	2	122	0.0163934	16/17697	0.00531001	0.0293113	0.0214636	PRNP/TMPO	2
MF	GO:0016888	endodeoxyribonuclease activity, producing 5'-phosphomonoesters	2	122	0.0163934	16/17697	0.00531001	0.0293113	0.0214636	FEN1/EXO1	2
MF	GO:0043274	phospholipase binding	2	122	0.0163934	16/17697	0.00531001	0.0293113	0.0214636	LMNB1/SNCA	2
CC	GO:0005881	cytoplasmic microtubule	8	124	0.0645161	69/19717	1.18187e-08	1.71023e-07	1.24407e-07	CLIP1/TUBA1A/HDAC6/TUBGCP2/MAPRE3/CKAP2/GTSE1/KIF18B	8
BP	GO:0051054	positive regulation of DNA metabolic process	14	122	0.114754	228/18670	2.93429e-10	1.21055e-08	9.35163e-09	CCT6A/CDK1/FOXM1/PCNA/RFC2/RFC5/TCP1/CDC7/TIMELESS/AURKB/CCT2/CACYBP/NABP2/CDT1	14
MF	GO:0000900	translation repressor activity, mRNA regulatory element binding	2	122	0.0163934	15/17697	0.00466722	0.0274075	0.0200696	DHFR/TYMS	2
BP	GO:0000910	cytokinesis	14	122	0.114754	171/18670	6.20148e-12	3.87893e-10	2.99651e-10	CENPA/CFL1/INCENP/STMN1/PLK1/PRC1/AURKB/KIF23/KIF20A/KIF4A/CKAP2/RACGAP1/NUSAP1/CDT1	14
BP	GO:0051225	spindle assembly	14	122	0.114754	108/18670	1.00558e-14	1.08323e-12	8.36808e-13	KIF2A/KIF11/KIFC1/PLK1/AURKB/KIF23/TUBGCP2/MAPRE3/TPX2/KIF4A/FBXO5/RACGAP1/TUBB1/TUBB	14
BP	GO:0006323	DNA packaging	15	122	0.122951	210/18670	7.54631e-12	4.57259e-10	3.53237e-10	CCNB1/CDK1/CENPA/CENPI/MCM2/CHAF1B/NCAPH/NUSAP1/POLE3/NCAPG2/HJURP/NCAPG/CENPO/CENPL/CDCA5	15
BP	GO:0010389	regulation of G2/M transition of mitotic cell cycle	15	122	0.122951	196/18670	2.78579e-12	1.92916e-10	1.49029e-10	CCNB1/CDK1/PLK1/PSMB2/TUBA1A/CDC7/AURKB/CKAP5/PSMD14/TUBB4B/TPX2/FBXO5/CENPJ/CLSPN/TUBB	15
CC	GO:0005871	kinesin complex	8	124	0.0645161	55/19717	1.85197e-09	3.25418e-08	2.36718e-08	KIF2A/KIF5B/KIF11/KIFC1/KIF23/KIF20A/KIF4A/KIF18B	8
KEGG	hsa00670	One carbon pool by folate	2	59	0.0338983	20/8076	0.00916166	0.0283575	0.01791	DHFR/TYMS	2
BP	GO:0006261	DNA-dependent DNA replication	15	122	0.122951	153/18670	7.29968e-14	5.89753e-12	4.5559e-12	FEN1/MCM2/MCM3/MCM6/PCNA/PRIM1/RFC2/RFC5/CDC7/TIMELESS/GINS1/RNASEH2A/FBXO5/POLE3/CDT1	15
BP	GO:0010639	negative regulation of organelle organization	16	122	0.131148	395/18670	6.35634e-09	1.83954e-07	1.42106e-07	CCNB1/CCNF/CHEK1/STMN1/MAD2L1/MAPT/MCM2/PLK1/SNCA/AURKB/HDAC6/NDC80/FBXO5/CKAP2/CDT1/CAMSAP1	16
CC	GO:0000790	nuclear chromatin	7	124	0.0564516	377/19717	0.00986841	0.0380219	0.0276582	CENPA/SSRP1/TCP1/CHAF1B/TIMELESS/UHRF1/CDCA5	7
BP	GO:0000082	G1/S transition of mitotic cell cycle	16	122	0.131148	279/18670	4.01264e-11	2.10284e-09	1.62446e-09	CCNB1/CDK1/DHFR/MCM2/MCM3/MCM6/PCNA/PRIM1/RRM2/TYMS/CDC7/KHDRBS1/FBXO5/GTSE1/POLE3/CDT1	16
BP	GO:0000075	cell cycle checkpoint	16	122	0.131148	216/18670	8.23902e-13	5.91684e-11	4.57081e-11	CCNB1/CDK1/CHEK1/MAD2L1/PCNA/PLK1/TIMELESS/AURKB/NDC80/ZWINT/GTSE1/CLSPN/DCLRE1B/NABP2/WDR76/CDT1	16
BP	GO:0007052	mitotic spindle organization	16	122	0.131148	106/18670	9.04834e-18	1.34959e-15	1.04257e-15	CCNB1/KIF2A/KIF11/KIFC1/STMN1/PLK1/RAN/TBCE/PRC1/AURKB/KIF23/NDC80/TPX2/KIF4A/RACGAP1/SPC25	16
BP	GO:0010948	negative regulation of cell cycle process	17	122	0.139344	361/18670	2.05937e-10	8.68069e-09	6.70591e-09	CCNB1/CCNF/CDK1/CHEK1/MAD2L1/PCNA/PLK1/PSMB2/RRM2/CDC7/AURKB/PSMD14/NDC80/FBXO5/GTSE1/CLSPN/CDT1	17
BP	GO:0045930	negative regulation of mitotic cell cycle	17	122	0.139344	338/18670	7.41351e-11	3.42257e-09	2.64397e-09	CCNB1/CDK1/CHEK1/MAD2L1/PCNA/PLK1/PSMB2/AURKB/PSMD14/NDC80/ZWINT/FBXO5/GTSE1/CLSPN/DCLRE1B/NABP2/CDT1	17
BP	GO:0044843	cell cycle G1/S phase transition	17	122	0.139344	298/18670	1.02172e-11	5.50309e-10	4.25119e-10	CCNA2/CCNB1/CDK1/DHFR/MCM2/MCM3/MCM6/PCNA/PRIM1/RRM2/TYMS/CDC7/KHDRBS1/FBXO5/GTSE1/POLE3/CDT1	17
BP	GO:0090068	positive regulation of cell cycle process	17	122	0.139344	298/18670	1.02172e-11	5.50309e-10	4.25119e-10	CCNB1/CDK1/FEN1/MAD2L1/PCNA/CDC7/AURKB/KIF23/DLGAP5/NDC80/FBXO5/RACGAP1/NUSAP1/GTSE1/CENPJ/CDT1/CDCA5	17
BP	GO:0032886	regulation of microtubule-based process	17	122	0.139344	218/18670	6.48666e-14	5.46854e-12	4.22449e-12	CCNF/CHEK1/KIF11/STMN1/MAPT/PLK1/CLIP1/SNCA/HDAC6/MAPRE3/TPX2/CKAP2/CENPJ/STMN4/CAMSAP1/SKA1/SKA2	17
BP	GO:1902749	regulation of cell cycle G2/M phase transition	17	122	0.139344	213/18670	4.42243e-14	4.23275e-12	3.26984e-12	CCNB1/CDK1/CHEK1/PLK1/PSMB2/TUBA1A/CDC7/AURKB/CKAP5/PSMD14/TUBB4B/TPX2/FBXO5/GTSE1/CENPJ/CLSPN/TUBB	17
MF	GO:0016893	endonuclease activity, active with either ribo- or deoxyribonucleic acids and producing 5'-phosphomonoesters	3	122	0.0245902	46/17697	0.0039096	0.0234576	0.0171772	FEN1/EXO1/RNASEH2A	3
KEGG	hsa00240	Pyrimidine metabolism	3	59	0.0508475	57/8076	0.0081944	0.0266318	0.0168201	DTYMK/RRM2/TYMS	3
BP	GO:0070507	regulation of microtubule cytoskeleton organization	17	122	0.139344	186/18670	4.62577e-15	5.2761e-13	4.07584e-13	CCNF/CHEK1/KIF11/STMN1/MAPT/PLK1/CLIP1/SNCA/HDAC6/MAPRE3/TPX2/CKAP2/CENPJ/STMN4/CAMSAP1/SKA1/SKA2	17
BP	GO:0031109	microtubule polymerization or depolymerization	17	122	0.139344	112/18670	7.31602e-19	1.77322e-16	1.36983e-16	KIF2A/STMN1/MAPT/CLIP1/SNCA/CKAP5/HDAC6/TUBGCP2/MAPRE3/FBXO5/CKAP2/CENPJ/STMN4/KIF18B/CAMSAP1/SKA1/SKA2	17
CC	GO:0034399	nuclear periphery	7	124	0.0564516	131/19717	1.92134e-05	0.000165293	0.000120239	CFL1/LMNB1/MAPT/PCNA/SUV39H1/KIF4A/UHRF1	7
BP	GO:0051052	regulation of DNA metabolic process	18	122	0.147541	429/18670	3.74409e-10	1.51246e-08	1.16839e-08	CCNA2/CCT6A/CDK1/CHEK1/FOXM1/KPNA2/PCNA/RFC2/RFC5/TCP1/CDC7/TIMELESS/AURKB/CCT2/FBXO5/CACYBP/NABP2/CDT1	18
BP	GO:0033044	regulation of chromosome organization	18	122	0.147541	342/18670	9.19627e-12	5.24458e-10	4.05148e-10	CCNB1/CCT6A/CHEK1/FEN1/MAD2L1/MAPT/MCM2/PLK1/SNCA/TCP1/AURKB/DLGAP5/NDC80/CCT2/FBXO5/NABP2/CDT1/CDCA5	18
BP	GO:0045787	positive regulation of cell cycle	19	122	0.155738	389/18670	8.50913e-12	4.99976e-10	3.86236e-10	CCNB1/CDK1/CHEK1/FEN1/MAD2L1/PCNA/CDC7/AURKB/KIF23/DLGAP5/NDC80/MAPRE3/FBXO5/RACGAP1/NUSAP1/GTSE1/CENPJ/CDT1/CDCA5	19
BP	GO:1902850	microtubule cytoskeleton organization involved in mitosis	19	122	0.155738	131/18670	1.38685e-20	4.48183e-18	3.46225e-18	CCNB1/CENPA/KIF2A/KIF11/KIFC1/STMN1/MAD2L1/PLK1/RAN/TBCE/PRC1/AURKB/KIF23/NDC80/TPX2/KIF4A/RACGAP1/NUSAP1/SPC25	19
BP	GO:0007063	regulation of sister chromatid cohesion	2	122	0.0163934	22/18670	0.00898188	0.0490588	0.0378983	FEN1/CDCA5	2
BP	GO:0010310	regulation of hydrogen peroxide metabolic process	2	122	0.0163934	21/18670	0.00820015	0.045559	0.0351947	SNCA/HDAC6	2
BP	GO:0007095	mitotic G2 DNA damage checkpoint	2	122	0.0163934	20/18670	0.00745082	0.0417548	0.0322559	CDK1/CLSPN	2
BP	GO:0009219	pyrimidine deoxyribonucleotide metabolic process	2	122	0.0163934	20/18670	0.00745082	0.0417548	0.0322559	DTYMK/TYMS	2
BP	GO:0001832	blastocyst growth	2	122	0.0163934	19/18670	0.00673436	0.0380697	0.0294092	GINS1/NCAPG2	2
BP	GO:0009148	pyrimidine nucleoside triphosphate biosynthetic process	2	122	0.0163934	19/18670	0.00673436	0.0380697	0.0294092	DTYMK/TYMS	2
BP	GO:0046653	tetrahydrofolate metabolic process	2	122	0.0163934	19/18670	0.00673436	0.0380697	0.0294092	DHFR/TYMS	2
BP	GO:0051131	chaperone-mediated protein complex assembly	2	122	0.0163934	19/18670	0.00673436	0.0380697	0.0294092	HDAC6/CCT2	2
BP	GO:0009200	deoxyribonucleoside triphosphate metabolic process	2	122	0.0163934	18/18670	0.0060512	0.0349205	0.0269764	DTYMK/TYMS	2
BP	GO:0033262	regulation of nuclear cell cycle DNA replication	2	122	0.0163934	17/18670	0.00540182	0.0314538	0.0242984	CDC7/CDT1	2
BP	GO:0062033	positive regulation of mitotic sister chromatid segregation	2	122	0.0163934	17/18670	0.00540182	0.0314538	0.0242984	DLGAP5/CDT1	2
BP	GO:0097329	response to antimetabolite	2	122	0.0163934	17/18670	0.00540182	0.0314538	0.0242984	DHFR/TIMELESS	2
BP	GO:1904355	positive regulation of telomere capping	2	122	0.0163934	17/18670	0.00540182	0.0314538	0.0242984	AURKB/NABP2	2
BP	GO:0051444	negative regulation of ubiquitin-protein transferase activity	2	122	0.0163934	16/18670	0.00478668	0.0283834	0.0219264	MAD2L1/FBXO5	2
BP	GO:0055012	ventricular cardiac muscle cell differentiation	2	122	0.0163934	16/18670	0.00478668	0.0283834	0.0219264	CCNB1/CDK1	2
BP	GO:0051299	centrosome separation	2	122	0.0163934	15/18670	0.00420625	0.0254669	0.0196734	CHEK1/KIF11	2
BP	GO:0006268	DNA unwinding involved in DNA replication	2	122	0.0163934	14/18670	0.00366101	0.0224643	0.0173538	MCM2/MCM6	2
MF	GO:0005542	folic acid binding	2	122	0.0163934	12/17697	0.0029736	0.0185002	0.013547	DHFR/TYMS	2
MF	GO:0051011	microtubule minus-end binding	2	122	0.0163934	12/17697	0.0029736	0.0185002	0.013547	TUBGCP2/CAMSAP1	2
MF	GO:1990825	sequence-specific mRNA binding	2	122	0.0163934	12/17697	0.0029736	0.0185002	0.013547	DHFR/TYMS	2
MF	GO:0019894	kinesin binding	3	122	0.0245902	42/17697	0.00301634	0.0185002	0.013547	SNCA/PRC1/KIF18B	3
CC	GO:0005657	replication fork	7	124	0.0564516	70/19717	2.83198e-07	3.31746e-06	2.41321e-06	MCM3/PCNA/PRIM1/RFC2/RFC5/TIMELESS/UHRF1	7
BP	GO:0007100	mitotic centrosome separation	2	122	0.0163934	14/18670	0.00366101	0.0224643	0.0173538	CHEK1/KIF11	2
BP	GO:0048308	organelle inheritance	2	122	0.0163934	14/18670	0.00366101	0.0224643	0.0173538	CDK1/YWHAZ	2
BP	GO:0048313	Golgi inheritance	2	122	0.0163934	14/18670	0.00366101	0.0224643	0.0173538	CDK1/YWHAZ	2
BP	GO:0071428	rRNA-containing ribonucleoprotein complex export from nucleus	2	122	0.0163934	14/18670	0.00366101	0.0224643	0.0173538	RAN/LTV1	2
BP	GO:0072425	signal transduction involved in G2 DNA damage checkpoint	2	122	0.0163934	14/18670	0.00366101	0.0224643	0.0173538	CHEK1/PLK1	2
BP	GO:0000054	ribosomal subunit export from nucleus	2	122	0.0163934	13/18670	0.00315144	0.0201008	0.0155281	RAN/LTV1	2
BP	GO:0001833	inner cell mass cell proliferation	2	122	0.0163934	13/18670	0.00315144	0.0201008	0.0155281	GINS1/NCAPG2	2
BP	GO:0031115	negative regulation of microtubule polymerization	2	122	0.0163934	13/18670	0.00315144	0.0201008	0.0155281	STMN1/SNCA	2
BP	GO:0033750	ribosome localization	2	122	0.0163934	13/18670	0.00315144	0.0201008	0.0155281	RAN/LTV1	2
CC	GO:0150034	distal axon	6	124	0.0483871	285/19717	0.00934168	0.0370654	0.0269624	KIF5B/MAPT/SNCA/HNRNPR/TUBB3/STMN4	6
BP	GO:0051315	attachment of mitotic spindle microtubules to kinetochore	2	122	0.0163934	13/18670	0.00315144	0.0201008	0.0155281	NDC80/CDT1	2
BP	GO:0009265	2'-deoxyribonucleotide biosynthetic process	2	122	0.0163934	12/18670	0.00267802	0.0178443	0.0137849	DTYMK/TYMS	2
BP	GO:0046385	deoxyribose phosphate biosynthetic process	2	122	0.0163934	12/18670	0.00267802	0.0178443	0.0137849	DTYMK/TYMS	2
MF	GO:0048487	beta-tubulin binding	3	122	0.0245902	38/17697	0.00226132	0.0152226	0.0111469	SNCA/HDAC6/RACGAP1	3
MF	GO:0051082	unfolded protein binding	5	122	0.0409836	131/17697	0.00213793	0.0147517	0.0108022	CCT6A/TCP1/CHAF1B/TUBB4B/CCT2	5
BP	GO:0051988	regulation of attachment of spindle microtubules to kinetochore	2	122	0.0163934	12/18670	0.00267802	0.0178443	0.0137849	CCNB1/RACGAP1	2
BP	GO:0070493	thrombin-activated receptor signaling pathway	2	122	0.0163934	12/18670	0.00267802	0.0178443	0.0137849	STMN1/SNCA	2
BP	GO:1904668	positive regulation of ubiquitin protein ligase activity	2	122	0.0163934	12/18670	0.00267802	0.0178443	0.0137849	PLK1/UBE2S	2
BP	GO:2000105	positive regulation of DNA-dependent DNA replication	2	122	0.0163934	12/18670	0.00267802	0.0178443	0.0137849	CDC7/CDT1	2
BP	GO:0035404	histone-serine phosphorylation	2	122	0.0163934	11/18670	0.00224125	0.0155206	0.0119898	CCNB1/AURKB	2
BP	GO:0055015	ventricular cardiac muscle cell development	2	122	0.0163934	11/18670	0.00224125	0.0155206	0.0119898	CCNB1/CDK1	2
CC	GO:0030427	site of polarized growth	6	124	0.0483871	176/19717	0.0008695	0.00509279	0.00370464	KIF5B/MAPT/SNCA/HNRNPR/TUBB3/STMN4	6
CC	GO:0030426	growth cone	6	124	0.0483871	171/19717	0.000748337	0.00449002	0.00326617	KIF5B/MAPT/SNCA/HNRNPR/TUBB3/STMN4	6
CC	GO:1902911	protein kinase complex	6	124	0.0483871	109/19717	6.54008e-05	0.000446906	0.000325092	CCNA2/CCNB1/CCNF/CDK1/PCNA/CCNB2	6
CC	GO:1902554	serine/threonine protein kinase complex	6	124	0.0483871	88/19717	1.94858e-05	0.000165293	0.000120239	CCNA2/CCNB1/CCNF/CDK1/PCNA/CCNB2	6
BP	GO:0090042	tubulin deacetylation	2	122	0.0163934	11/18670	0.00224125	0.0155206	0.0119898	MAPT/HDAC6	2
BP	GO:1905820	positive regulation of chromosome separation	2	122	0.0163934	11/18670	0.00224125	0.0155206	0.0119898	DLGAP5/CDT1	2
BP	GO:1902101	positive regulation of metaphase/anaphase transition of cell cycle	2	122	0.0163934	10/18670	0.00184161	0.0132746	0.0102548	DLGAP5/CDT1	2
CC	GO:0000792	heterochromatin	6	124	0.0483871	78/19717	9.72034e-06	8.85631e-05	6.44233e-05	CENPA/INCENP/SUV39H1/TCP1/UHRF1/WDR76	6
MF	GO:0016891	endoribonuclease activity, producing 5'-phosphomonoesters	3	122	0.0245902	34/17697	0.0016365	0.0115814	0.00848065	FEN1/EXO1/RNASEH2A	3
CC	GO:0000307	cyclin-dependent protein kinase holoenzyme complex	6	124	0.0483871	42/19717	2.38756e-07	2.9367e-06	2.13624e-06	CCNA2/CCNB1/CCNF/CDK1/PCNA/CCNB2	6
CC	GO:0000780	condensed nuclear chromosome, centromeric region	6	124	0.0483871	26/19717	1.1376e-08	1.71023e-07	1.24407e-07	CCNB1/CENPA/PLK1/AURKB/NDC80/CENPO	6
BP	GO:1903862	positive regulation of oxidative phosphorylation	2	122	0.0163934	10/18670	0.00184161	0.0132746	0.0102548	CCNB1/CDK1	2
CC	GO:0032993	protein-DNA complex	5	124	0.0403226	202/19717	0.00905471	0.0365157	0.0265626	CENPA/MCM3/PCNA/PRIM1/GINS1	5
CC	GO:0005814	centriole	5	124	0.0403226	139/19717	0.00186466	0.0101935	0.00741504	CCNF/KIF2A/PLK1/RAN/CENPJ	5
MF	GO:0008094	DNA-dependent ATPase activity	4	122	0.0327869	69/17697	0.00131539	0.00955392	0.006996	MCM2/MCM6/RFC2/RFC5	4
BP	GO:0071103	DNA conformation change	20	122	0.163934	327/18670	3.46758e-14	3.53876e-12	2.73372e-12	CCNB1/CDK1/CENPA/CENPI/MCM2/MCM3/MCM6/RFC2/RFC5/CHAF1B/GINS1/NCAPH/NUSAP1/POLE3/NCAPG2/HJURP/NCAPG/CENPO/CENPL/CDCA5	20
BP	GO:0000086	G2/M transition of mitotic cell cycle	20	122	0.163934	247/18670	1.58715e-16	2.1982e-14	1.69813e-14	CCNA2/CCNB1/CDK1/FOXM1/PLK1/PSMB2/TUBA1A/CDC7/CCNB2/AURKB/CKAP5/MELK/PSMD14/TUBB4B/KHDRBS1/TPX2/FBXO5/CENPJ/CLSPN/TUBB	20
BP	GO:0000070	mitotic sister chromatid segregation	21	122	0.172131	151/18670	2.84781e-22	1.84063e-19	1.42191e-19	CCNB1/INCENP/KIFC1/MAD2L1/PLK1/RAN/PRC1/AURKB/KIF23/DLGAP5/NDC80/ZWINT/NCAPH/KIF4A/FBXO5/RACGAP1/NUSAP1/NCAPG/CDT1/CDCA5/KIF18B	21
BP	GO:1901990	regulation of mitotic cell cycle phase transition	22	122	0.180328	444/18670	1.19123e-13	8.88381e-12	6.86283e-12	CCNB1/CDK1/MAD2L1/PCNA/PLK1/PSMB2/TUBA1A/CDC7/AURKB/DLGAP5/CKAP5/PSMD14/TUBB4B/NDC80/TPX2/FBXO5/GTSE1/CENPJ/CLSPN/CDT1/CDCA5/TUBB	22
BP	GO:0044839	cell cycle G2/M phase transition	22	122	0.180328	266/18670	2.66639e-18	4.30844e-16	3.32831e-16	CCNA2/CCNB1/CDK1/CHEK1/FOXM1/PLK1/PSMB2/TUBA1A/CDC7/CCNB2/AURKB/CKAP5/MELK/PSMD14/TUBB4B/KHDRBS1/TPX2/FBXO5/GTSE1/CENPJ/CLSPN/TUBB	22
BP	GO:0098813	nuclear chromosome segregation	22	122	0.180328	262/18670	1.92348e-18	3.39057e-16	2.61925e-16	CCNB1/FEN1/INCENP/KIFC1/MAD2L1/PLK1/RAN/PRC1/AURKB/KIF23/DLGAP5/NDC80/ZWINT/NCAPH/KIF4A/FBXO5/RACGAP1/NUSAP1/NCAPG/CDT1/CDCA5/KIF18B	22
CC	GO:0045171	intercellular bridge	5	124	0.0403226	59/19717	3.46132e-05	0.000274672	0.000199805	CDC7/KIF23/KIF20A/TPX2/KIF4A	5
BP	GO:0000819	sister chromatid segregation	22	122	0.180328	189/18670	1.4781e-21	7.1651e-19	5.53511e-19	CCNB1/FEN1/INCENP/KIFC1/MAD2L1/PLK1/RAN/PRC1/AURKB/KIF23/DLGAP5/NDC80/ZWINT/NCAPH/KIF4A/FBXO5/RACGAP1/NUSAP1/NCAPG/CDT1/CDCA5/KIF18B	22
BP	GO:0007051	spindle organization	22	122	0.180328	170/18670	1.36642e-22	1.32474e-19	1.02337e-19	CCNB1/KIF2A/KIF11/KIFC1/STMN1/PLK1/RAN/TBCE/PRC1/AURKB/KIF23/CKAP5/NDC80/TUBGCP2/MAPRE3/TPX2/KIF4A/FBXO5/RACGAP1/SPC25/TUBB1/TUBB	22
BP	GO:1901987	regulation of cell cycle phase transition	23	122	0.188525	480/18670	6.24274e-14	5.46854e-12	4.22449e-12	CCNB1/CDK1/CHEK1/MAD2L1/PCNA/PLK1/PSMB2/TUBA1A/CDC7/AURKB/DLGAP5/CKAP5/PSMD14/TUBB4B/NDC80/TPX2/FBXO5/GTSE1/CENPJ/CLSPN/CDT1/CDCA5/TUBB	23
BP	GO:0006260	DNA replication	24	122	0.196721	274/18670	1.69715e-20	4.70111e-18	3.63165e-18	CCNA2/CDK1/CHEK1/FEN1/MCM2/MCM3/MCM6/PCNA/PRIM1/RFC2/RFC5/RRM2/SSRP1/CHAF1B/CDC7/TIMELESS/EXO1/GINS1/RNASEH2A/FBXO5/CACYBP/POLE3/CLSPN/CDT1	24
MF	GO:0004386	helicase activity	6	122	0.0491803	163/17697	0.000933863	0.00696611	0.00510104	MCM2/MCM3/MCM6/RFC2/RFC5/GINS1	6
MF	GO:0031625	ubiquitin protein ligase binding	8	122	0.0655738	290/17697	0.000906288	0.00694821	0.00508793	PA2G4/TCP1/YWHAZ/HDAC6/CCT2/CACYBP/UBE2T/TUBB	8
BP	GO:0000280	nuclear division	26	122	0.213115	407/18670	1.03755e-18	2.0118e-16	1.55413e-16	CCNB1/CHEK1/INCENP/KIF2A/KIF11/KIFC1/MAD2L1/PLK1/RAN/PRC1/AURKB/KIF23/DLGAP5/NDC80/ZWINT/TPX2/NCAPH/KIF4A/FBXO5/UBE2S/RACGAP1/NUSAP1/NCAPG/CDT1/CDCA5/KIF18B	26
BP	GO:0007059	chromosome segregation	26	122	0.213115	321/18670	2.67056e-21	1.03564e-18	8.00043e-19	CCNB1/FEN1/INCENP/KIFC1/MAD2L1/PLK1/RAN/PRC1/AURKB/KIF23/DLGAP5/NDC80/ZWINT/NCAPH/KIF4A/FBXO5/RACGAP1/NUSAP1/HJURP/SPC25/NCAPG/CDT1/CDCA5/KIF18B/SKA1/SKA2	26
BP	GO:0140014	mitotic nuclear division	26	122	0.213115	264/18670	1.74902e-23	3.39135e-20	2.61985e-20	CCNB1/CHEK1/INCENP/KIF2A/KIF11/KIFC1/MAD2L1/PLK1/RAN/PRC1/AURKB/KIF23/DLGAP5/NDC80/ZWINT/TPX2/NCAPH/KIF4A/FBXO5/UBE2S/RACGAP1/NUSAP1/NCAPG/CDT1/CDCA5/KIF18B	26
BP	GO:0048285	organelle fission	27	122	0.221311	449/18670	9.62765e-19	2.0118e-16	1.55413e-16	CCNB1/CHEK1/INCENP/KIF2A/KIF11/KIFC1/MAD2L1/MAPT/PLK1/RAN/PRC1/AURKB/KIF23/DLGAP5/NDC80/ZWINT/TPX2/NCAPH/KIF4A/FBXO5/UBE2S/RACGAP1/NUSAP1/NCAPG/CDT1/CDCA5/KIF18B	27
BP	GO:0045739	positive regulation of DNA repair	3	122	0.0245902	65/18670	0.00885779	0.0486551	0.0375865	FOXM1/PCNA/TIMELESS	3
BP	GO:0007062	sister chromatid cohesion	3	122	0.0245902	63/18670	0.00812911	0.0452941	0.0349901	FEN1/PLK1/CDCA5	3
BP	GO:0046824	positive regulation of nucleocytoplasmic transport	3	122	0.0245902	62/18670	0.00777857	0.0434658	0.0335777	RAN/KHDRBS1/GTSE1	3
BP	GO:0098930	axonal transport	3	122	0.0245902	58/18670	0.00646706	0.0369901	0.0285752	KIF5B/MAPT/KIF4A	3
BP	GO:0016233	telomere capping	3	122	0.0245902	55/18670	0.00557696	0.0322798	0.0249364	AURKB/DCLRE1B/NABP2	3
BP	GO:0031122	cytoplasmic microtubule organization	3	122	0.0245902	53/18670	0.00502709	0.0297181	0.0229575	MAPT/TUBGCP2/CAMSAP1	3
BP	GO:0006301	postreplication repair	3	122	0.0245902	52/18670	0.004765	0.0283834	0.0219264	PCNA/RFC2/RFC5	3
BP	GO:0000731	DNA synthesis involved in DNA repair	3	122	0.0245902	51/18670	0.00451137	0.0270822	0.0209212	PCNA/RFC2/RFC5	3
BP	GO:0070671	response to interleukin-12	3	122	0.0245902	50/18670	0.00426611	0.0256894	0.0198453	CFL1/LMNB1/TCP1	3
BP	GO:0071349	cellular response to interleukin-12	3	122	0.0245902	49/18670	0.00402916	0.0244907	0.0189193	CFL1/LMNB1/TCP1	3
MF	GO:0004529	exodeoxyribonuclease activity	3	122	0.0245902	25/17697	0.000658058	0.00518925	0.00379991	FEN1/EXO1/DCLRE1B	3
BP	GO:0051972	regulation of telomerase activity	3	122	0.0245902	48/18670	0.00380041	0.0231729	0.0179013	TCP1/AURKB/CCT2	3
BP	GO:0035722	interleukin-12-mediated signaling pathway	3	122	0.0245902	47/18670	0.00357979	0.0223999	0.0173041	CFL1/LMNB1/TCP1	3
BP	GO:0045023	G0 to G1 transition	3	122	0.0245902	47/18670	0.00357979	0.0223999	0.0173041	CHEK1/RRM2/CDC7	3
KEGG	hsa03410	Base excision repair	3	59	0.0508475	33/8076	0.00172939	0.00591634	0.00373664	FEN1/PCNA/POLE3	3
CC	GO:0051233	spindle midzone	5	124	0.0403226	34/19717	2.18115e-06	2.14625e-05	1.56124e-05	PLK1/AURKB/MAPRE3/RACGAP1/KIF18B	5
BP	GO:0031648	protein destabilization	3	122	0.0245902	46/18670	0.00336719	0.021267	0.016429	PLK1/PRNP/SNCA	3
BP	GO:0070316	regulation of G0 to G1 transition	3	122	0.0245902	45/18670	0.00316253	0.0201054	0.0155316	CHEK1/RRM2/CDC7	3
BP	GO:0046688	response to copper ion	3	122	0.0245902	44/18670	0.00296571	0.0194932	0.0150587	CDK1/PRNP/SNCA	3
BP	GO:0019985	translesion synthesis	3	122	0.0245902	41/18670	0.00242126	0.016531	0.0127704	PCNA/RFC2/RFC5	3
MF	GO:0003688	DNA replication origin binding	3	122	0.0245902	24/17697	0.000582008	0.00472454	0.00345961	MCM2/MCM3/MCM6	3
BP	GO:0070317	negative regulation of G0 to G1 transition	3	122	0.0245902	41/18670	0.00242126	0.016531	0.0127704	CHEK1/RRM2/CDC7	3
BP	GO:0032467	positive regulation of cytokinesis	3	122	0.0245902	40/18670	0.00225476	0.0155586	0.0120192	AURKB/KIF23/RACGAP1	3
BP	GO:0033683	nucleotide-excision repair, DNA incision	3	122	0.0245902	39/18670	0.00209557	0.0147757	0.0114143	PCNA/RFC2/RFC5	3
BP	GO:0042769	DNA damage response, detection of DNA damage	3	122	0.0245902	39/18670	0.00209557	0.0147757	0.0114143	PCNA/RFC2/RFC5	3
BP	GO:0006298	mismatch repair	3	122	0.0245902	38/18670	0.00194357	0.0138551	0.0107032	PCNA/EXO1/RNASEH2A	3
CC	GO:1990752	microtubule end	5	124	0.0403226	29/19717	9.54585e-07	1.02099e-05	7.42698e-06	CLIP1/CKAP5/MAPRE3/KIF18B/CAMSAP1	5
BP	GO:0006296	nucleotide-excision repair, DNA incision, 5'-to lesion	3	122	0.0245902	37/18670	0.00179865	0.0130621	0.0100906	PCNA/RFC2/RFC5	3
MF	GO:0016895	exodeoxyribonuclease activity, producing 5'-phosphomonoesters	3	122	0.0245902	23/17697	0.000511823	0.0042807	0.00313461	FEN1/EXO1/DCLRE1B	3
BP	GO:0051973	positive regulation of telomerase activity	3	122	0.0245902	36/18670	0.00166068	0.0121055	0.00935158	TCP1/AURKB/CCT2	3
BP	GO:0009262	deoxyribonucleotide metabolic process	3	122	0.0245902	35/18670	0.00152953	0.011234	0.00867834	DTYMK/RRM2/TYMS	3
BP	GO:0002082	regulation of oxidative phosphorylation	3	122	0.0245902	31/18670	0.00107062	0.00801518	0.00619179	CCNB1/CDK1/SNCA	3
BP	GO:0007143	female meiotic nuclear division	3	122	0.0245902	31/18670	0.00107062	0.00801518	0.00619179	PLK1/NCAPH/FBXO5	3
BP	GO:0043457	regulation of cellular respiration	3	122	0.0245902	31/18670	0.00107062	0.00801518	0.00619179	CCNB1/CDK1/SNCA	3
BP	GO:0015949	nucleobase-containing small molecule interconversion	3	122	0.0245902	29/18670	0.000878629	0.00670733	0.00518147	DTYMK/RRM2/TYMS	3
BP	GO:0031114	regulation of microtubule depolymerization	3	122	0.0245902	29/18670	0.000878629	0.00670733	0.00518147	HDAC6/CKAP2/CAMSAP1	3
CC	GO:0000778	condensed nuclear chromosome kinetochore	5	124	0.0403226	15/19717	2.59019e-08	3.35361e-07	2.43951e-07	CCNB1/CENPA/PLK1/NDC80/CENPO	5
MF	GO:0019001	guanyl nucleotide binding	10	122	0.0819672	394/17697	0.000401955	0.00346686	0.00253867	RAN/TUBB2A/TUBA1A/TUBB3/TUBB4B/TUBB1/TUBB6/TUBA1C/TUBB/TUBB2B	10
MF	GO:0032561	guanyl ribonucleotide binding	10	122	0.0819672	394/17697	0.000401955	0.00346686	0.00253867	RAN/TUBB2A/TUBA1A/TUBB3/TUBB4B/TUBB1/TUBB6/TUBA1C/TUBB/TUBB2B	10
BP	GO:0007026	negative regulation of microtubule depolymerization	3	122	0.0245902	25/18670	0.000563683	0.00465099	0.00359293	HDAC6/CKAP2/CAMSAP1	3
BP	GO:0006297	nucleotide-excision repair, DNA gap filling	3	122	0.0245902	23/18670	0.000438192	0.0037931	0.0029302	PCNA/RFC2/RFC5	3
BP	GO:0051383	kinetochore organization	3	122	0.0245902	21/18670	0.00033223	0.00299625	0.00231463	CENPA/NDC80/CDT1	3
MF	GO:0016538	cyclin-dependent protein serine/threonine kinase regulator activity	4	122	0.0327869	49/17697	0.000358402	0.00334468	0.00244919	CCNA2/CCNB1/CCNF/CCNB2	4
MF	GO:0001882	nucleoside binding	10	122	0.0819672	389/17697	0.000363552	0.00334468	0.00244919	RAN/TUBB2A/TUBA1A/TUBB3/TUBB4B/TUBB1/TUBB6/TUBA1C/TUBB/TUBB2B	10
MF	GO:0043138	3'-5' DNA helicase activity	3	122	0.0245902	20/17697	0.000334472	0.00329694	0.00241423	MCM2/MCM6/GINS1	3
MF	GO:0001883	purine nucleoside binding	10	122	0.0819672	381/17697	0.000308499	0.00321973	0.0023577	RAN/TUBB2A/TUBA1A/TUBB3/TUBB4B/TUBB1/TUBB6/TUBA1C/TUBB/TUBB2B	10
MF	GO:0032549	ribonucleoside binding	10	122	0.0819672	382/17697	0.000314973	0.00321973	0.0023577	RAN/TUBB2A/TUBA1A/TUBB3/TUBB4B/TUBB1/TUBB6/TUBA1C/TUBB/TUBB2B	10
MF	GO:0005525	GTP binding	10	122	0.0819672	374/17697	0.000266227	0.00319876	0.00234234	RAN/TUBB2A/TUBA1A/TUBB3/TUBB4B/TUBB1/TUBB6/TUBA1C/TUBB/TUBB2B	10
MF	GO:0044389	ubiquitin-like protein ligase binding	9	122	0.0737705	308/17697	0.000284782	0.00319876	0.00234234	CCNB1/PA2G4/TCP1/YWHAZ/HDAC6/CCT2/CACYBP/UBE2T/TUBB	9
MF	GO:0070182	DNA polymerase binding	3	122	0.0245902	19/17697	0.000285736	0.00319876	0.00234234	PCNA/NABP2/CDT1	3
MF	GO:0032550	purine ribonucleoside binding	10	122	0.0819672	378/17697	0.000289742	0.00319876	0.00234234	RAN/TUBB2A/TUBA1A/TUBB3/TUBB4B/TUBB1/TUBB6/TUBA1C/TUBB/TUBB2B	10
BP	GO:0042276	error-prone translesion synthesis	3	122	0.0245902	20/18670	0.00028613	0.00261701	0.00202166	PCNA/RFC2/RFC5	3
BP	GO:0070987	error-free translesion synthesis	3	122	0.0245902	20/18670	0.00028613	0.00261701	0.00202166	PCNA/RFC2/RFC5	3
BP	GO:0090670	RNA localization to Cajal body	3	122	0.0245902	19/18670	0.000244374	0.00230666	0.00178191	CCT6A/TCP1/CCT2	3
KEGG	hsa04218	Cellular senescence	6	59	0.101695	156/8076	0.000913352	0.00329821	0.00208308	CCNA2/CCNB1/CDK1/CHEK1/FOXM1/CCNB2	6
BP	GO:0090671	telomerase RNA localization to Cajal body	3	122	0.0245902	19/18670	0.000244374	0.00230666	0.00178191	CCT6A/TCP1/CCT2	3
BP	GO:0090672	telomerase RNA localization	3	122	0.0245902	19/18670	0.000244374	0.00230666	0.00178191	CCT6A/TCP1/CCT2	3
BP	GO:0090685	RNA localization to nucleus	3	122	0.0245902	19/18670	0.000244374	0.00230666	0.00178191	CCT6A/TCP1/CCT2	3
MF	GO:0008409	5'-3' exonuclease activity	3	122	0.0245902	17/17697	0.000202546	0.00266203	0.00194931	FEN1/EXO1/DCLRE1B	3
MF	GO:0051010	microtubule plus-end binding	3	122	0.0245902	17/17697	0.000202546	0.00266203	0.00194931	CLIP1/CKAP5/MAPRE3	3
BP	GO:1904872	regulation of telomerase RNA localization to Cajal body	3	122	0.0245902	18/18670	0.000206773	0.00199469	0.00154091	CCT6A/TCP1/CCT2	3
BP	GO:0000076	DNA replication checkpoint	3	122	0.0245902	16/18670	0.000143264	0.00146205	0.00112945	TIMELESS/CLSPN/CDT1	3
BP	GO:0009263	deoxyribonucleotide biosynthetic process	3	122	0.0245902	15/18670	0.00011696	0.00122586	0.000946991	DTYMK/RRM2/TYMS	3
BP	GO:1904874	positive regulation of telomerase RNA localization to Cajal body	3	122	0.0245902	15/18670	0.00011696	0.00122586	0.000946991	CCT6A/TCP1/CCT2	3
BP	GO:1904814	regulation of protein localization to chromosome, telomeric region	3	122	0.0245902	14/18670	9.40159e-05	0.00100163	0.000773768	CCT6A/TCP1/CCT2	3
BP	GO:0070202	regulation of establishment of protein localization to chromosome	3	122	0.0245902	12/18670	5.73686e-05	0.000635644	0.000491041	CCT6A/TCP1/CCT2	3
BP	GO:1904816	positive regulation of protein localization to chromosome, telomeric region	3	122	0.0245902	12/18670	5.73686e-05	0.000635644	0.000491041	CCT6A/TCP1/CCT2	3
BP	GO:1990173	protein localization to nucleoplasm	3	122	0.0245902	12/18670	5.73686e-05	0.000635644	0.000491041	CCT6A/TCP1/CCT2	3
CC	GO:0000940	condensed chromosome outer kinetochore	5	124	0.0403226	14/19717	1.73551e-08	2.37187e-07	1.72537e-07	CCNB1/PLK1/NDC80/SKA1/SKA2	5
BP	GO:0070203	regulation of establishment of protein localization to telomere	3	122	0.0245902	11/18670	4.32327e-05	0.000493107	0.000380929	CCT6A/TCP1/CCT2	3
BP	GO:1903405	protein localization to nuclear body	3	122	0.0245902	10/18670	3.15927e-05	0.000371262	0.000286803	CCT6A/TCP1/CCT2	3
BP	GO:1904851	positive regulation of establishment of protein localization to telomere	3	122	0.0245902	10/18670	3.15927e-05	0.000371262	0.000286803	CCT6A/TCP1/CCT2	3
BP	GO:1904867	protein localization to Cajal body	3	122	0.0245902	10/18670	3.15927e-05	0.000371262	0.000286803	CCT6A/TCP1/CCT2	3
BP	GO:2000134	negative regulation of G1/S transition of mitotic cell cycle	4	122	0.0327869	125/18670	0.00916738	0.0497915	0.0384643	CCNB1/CDK1/PCNA/GTSE1	4
BP	GO:0006282	regulation of DNA repair	4	122	0.0327869	122/18670	0.00843302	0.0467189	0.0360908	CHEK1/FOXM1/PCNA/TIMELESS	4
CC	GO:0005874	microtubule	44	124	0.354839	416/19717	3.25933e-42	8.01795e-40	5.83248e-40	CCT6A/CDK1/TBCB/DCX/INCENP/KIF2A/KIF5B/KIF11/KIFC1/STMN1/MAPT/PLK1/CLIP1/TBCE/TCP1/TUBB2A/TUBA1A/PRC1/AURKB/KIF23/CKAP5/HDAC6/KIF20A/TUBB3/TUBB4B/CCT2/TUBGCP2/MAPRE3/TPX2/KIF4A/CKAP2/RACGAP1/NUSAP1/GTSE1/CENPJ/TUBB1/TUBB6/TUBA1C/KIF18B/CAMSAP1/TUBB/SKA1/TUBB2B/SKA2	44
MF	GO:0003697	single-stranded DNA binding	6	122	0.0491803	113/17697	0.000131389	0.0019086	0.0013976	MAPT/MCM2/MCM3/MCM6/PRIM1/NABP2	6
BP	GO:0007569	cell aging	4	122	0.0327869	116/18670	0.00708243	0.039921	0.0308393	CDK1/CHEK1/FOXM1/FBXO5	4
BP	GO:0043244	regulation of protein complex disassembly	4	122	0.0327869	113/18670	0.0064644	0.0369901	0.0285752	CFL1/HDAC6/CKAP2/CAMSAP1	4
MF	GO:0043014	alpha-tubulin binding	4	122	0.0327869	37/17697	0.000119073	0.00182578	0.00133696	SNCA/TBCE/HDAC6/RACGAP1	4
BP	GO:1901879	regulation of protein depolymerization	4	122	0.0327869	83/18670	0.00214252	0.015052	0.0116278	CFL1/HDAC6/CKAP2/CAMSAP1	4
BP	GO:0071158	positive regulation of cell cycle arrest	4	122	0.0327869	82/18670	0.00204948	0.0145566	0.0112451	CCNB1/CDK1/PCNA/GTSE1	4
BP	GO:0006278	RNA-dependent DNA biosynthetic process	4	122	0.0327869	77/18670	0.00162588	0.0118965	0.00919018	CCT6A/TCP1/AURKB/CCT2	4
BP	GO:0031100	animal organ regeneration	4	122	0.0327869	73/18670	0.00133414	0.00983609	0.00759847	CCNA2/CDK1/PCNA/TYMS	4
BP	GO:0007004	telomere maintenance via telomerase	4	122	0.0327869	70/18670	0.0011409	0.00850847	0.00657287	CCT6A/TCP1/AURKB/CCT2	4
BP	GO:0051785	positive regulation of nuclear division	4	122	0.0327869	66/18670	0.000914962	0.0069573	0.00537458	DLGAP5/NUSAP1/CDT1/CDCA5	4
MF	GO:0003924	GTPase activity	10	122	0.0819672	324/17697	8.29651e-05	0.00134696	0.000986334	RAN/TUBB2A/TUBA1A/TUBB3/TUBB4B/TUBB1/TUBB6/TUBA1C/TUBB/TUBB2B	10
BP	GO:0044783	G1 DNA damage checkpoint	4	122	0.0327869	64/18670	0.00081475	0.00637016	0.00492101	CCNB1/CDK1/PCNA/GTSE1	4
BP	GO:0031571	mitotic G1 DNA damage checkpoint	4	122	0.0327869	63/18670	0.00076767	0.00602637	0.00465542	CCNB1/CDK1/PCNA/GTSE1	4
BP	GO:0044819	mitotic G1/S transition checkpoint	4	122	0.0327869	63/18670	0.00076767	0.00602637	0.00465542	CCNB1/CDK1/PCNA/GTSE1	4
BP	GO:0046686	response to cadmium ion	4	122	0.0327869	63/18670	0.00076767	0.00602637	0.00465542	CDK1/DTYMK/PCNA/PRNP	4
KEGG	hsa03420	Nucleotide excision repair	4	59	0.0677966	47/8076	0.000362574	0.00138631	0.000875567	PCNA/RFC2/RFC5/POLE3	4
MF	GO:0042393	histone binding	8	122	0.0655738	197/17697	6.6663e-05	0.00114994	0.000842058	MCM2/SNCA/SSRP1/CHAF1B/PWP1/UHRF1/NCAPG2/HJURP	8
BP	GO:1904356	regulation of telomere maintenance via telomere lengthening	4	122	0.0327869	62/18670	0.000722546	0.00574188	0.00443565	CCT6A/TCP1/AURKB/CCT2	4
BP	GO:0072413	signal transduction involved in mitotic cell cycle checkpoint	4	122	0.0327869	59/18670	0.000598446	0.00487557	0.00376642	CCNB1/CDK1/PCNA/GTSE1	4
BP	GO:1902402	signal transduction involved in mitotic DNA damage checkpoint	4	122	0.0327869	59/18670	0.000598446	0.00487557	0.00376642	CCNB1/CDK1/PCNA/GTSE1	4
MF	GO:0004523	RNA-DNA hybrid ribonuclease activity	3	122	0.0245902	11/17697	5.06563e-05	0.000932077	0.000682528	FEN1/EXO1/RNASEH2A	3
BP	GO:1902403	signal transduction involved in mitotic DNA integrity checkpoint	4	122	0.0327869	59/18670	0.000598446	0.00487557	0.00376642	CCNB1/CDK1/PCNA/GTSE1	4
BP	GO:0046605	regulation of centrosome cycle	4	122	0.0327869	58/18670	0.000560682	0.00464599	0.00358907	CCNF/CHEK1/KIF11/CENPJ	4
CC	GO:0044815	DNA packaging complex	4	124	0.0322581	115/19717	0.00602303	0.0259941	0.0189089	CENPA/NCAPH/NCAPG2/NCAPG	4
BP	GO:0072431	signal transduction involved in mitotic G1 DNA damage checkpoint	4	122	0.0327869	57/18670	0.000524643	0.00442297	0.00341678	CCNB1/CDK1/PCNA/GTSE1	4
BP	GO:1902400	intracellular signal transduction involved in G1 DNA damage checkpoint	4	122	0.0327869	57/18670	0.000524643	0.00442297	0.00341678	CCNB1/CDK1/PCNA/GTSE1	4
BP	GO:0006977	DNA damage response, signal transduction by p53 class mediator resulting in cell cycle arrest	4	122	0.0327869	56/18670	0.000490283	0.00420646	0.00324952	CCNB1/CDK1/PCNA/GTSE1	4
BP	GO:0032210	regulation of telomere maintenance via telomerase	4	122	0.0327869	54/18670	0.000426417	0.00374128	0.00289017	CCT6A/TCP1/AURKB/CCT2	4
BP	GO:0045840	positive regulation of mitotic nuclear division	4	122	0.0327869	53/18670	0.000396821	0.0035134	0.00271413	DLGAP5/NUSAP1/CDT1/CDCA5	4
BP	GO:0006998	nuclear envelope organization	4	122	0.0327869	52/18670	0.000368721	0.00327959	0.00253351	CCNB1/CDK1/PLK1/CCNB2	4
BP	GO:0051438	regulation of ubiquitin-protein transferase activity	4	122	0.0327869	52/18670	0.000368721	0.00327959	0.00253351	MAD2L1/PLK1/FBXO5/UBE2S	4
BP	GO:0032506	cytokinetic process	4	122	0.0327869	39/18670	0.0001196	0.0012468	0.000963166	AURKB/KIF23/KIF20A/RACGAP1	4
BP	GO:1904358	positive regulation of telomere maintenance via telomere lengthening	4	122	0.0327869	37/18670	9.70085e-05	0.00102787	0.000794036	CCT6A/TCP1/AURKB/CCT2	4
BP	GO:0051294	establishment of spindle orientation	4	122	0.0327869	35/18670	7.76872e-05	0.000836864	0.000646485	CENPA/MAD2L1/PLK1/NDC80	4
BP	GO:0032212	positive regulation of telomere maintenance via telomerase	4	122	0.0327869	34/18670	6.91566e-05	0.000753341	0.000581963	CCT6A/TCP1/AURKB/CCT2	4
BP	GO:0031572	G2 DNA damage checkpoint	4	122	0.0327869	31/18670	4.76368e-05	0.000540162	0.00041728	CDK1/CHEK1/PLK1/CLSPN	4
CC	GO:0016363	nuclear matrix	4	124	0.0322581	109/19717	0.0049881	0.0223104	0.0162292	CFL1/LMNB1/KIF4A/UHRF1	4
BP	GO:1902751	positive regulation of cell cycle G2/M phase transition	4	122	0.0327869	30/18670	4.17001e-05	0.00047844	0.000369599	CCNB1/CDK1/CDC7/FBXO5	4
MF	GO:0003678	DNA helicase activity	6	122	0.0491803	81/17697	2.01878e-05	0.000397989	0.000291433	MCM2/MCM3/MCM6/RFC2/RFC5/GINS1	6
BP	GO:0000132	establishment of mitotic spindle orientation	4	122	0.0327869	29/18670	3.6323e-05	0.000421738	0.000325796	CENPA/MAD2L1/PLK1/NDC80	4
BP	GO:0051984	positive regulation of chromosome segregation	4	122	0.0327869	28/18670	3.14714e-05	0.000371262	0.000286803	CCNB1/FEN1/DLGAP5/CDT1	4
BP	GO:0070198	protein localization to chromosome, telomeric region	4	122	0.0327869	28/18670	3.14714e-05	0.000371262	0.000286803	CCT6A/TCP1/CCT2/NABP2	4
BP	GO:0010971	positive regulation of G2/M transition of mitotic cell cycle	4	122	0.0327869	27/18670	2.71121e-05	0.000330631	0.000255415	CCNB1/CDK1/CDC7/FBXO5	4
BP	GO:0070199	establishment of protein localization to chromosome	4	122	0.0327869	25/18670	1.97408e-05	0.000248554	0.00019201	CCT6A/TCP1/CCT2/NABP2	4
BP	GO:1904666	regulation of ubiquitin protein ligase activity	4	122	0.0327869	22/18670	1.15897e-05	0.000151841	0.000117298	MAD2L1/PLK1/FBXO5/UBE2S	4
CC	GO:0035578	azurophil granule lumen	4	124	0.0322581	91/19717	0.00261263	0.0131165	0.00954131	PA2G4/TUBB4B/CCT2/TUBB	4
BP	GO:0007076	mitotic chromosome condensation	4	122	0.0327869	17/18670	3.86738e-06	5.76834e-05	4.45609e-05	NCAPH/NUSAP1/NCAPG/CDCA5	4
BP	GO:0034501	protein localization to kinetochore	4	122	0.0327869	17/18670	3.86738e-06	5.76834e-05	4.45609e-05	CDK1/AURKB/NDC80/CDT1	4
BP	GO:0030397	membrane disassembly	4	122	0.0327869	16/18670	2.97241e-06	4.6108e-05	3.56188e-05	CCNB1/CDK1/PLK1/CCNB2	4
BP	GO:0051081	nuclear envelope disassembly	4	122	0.0327869	16/18670	2.97241e-06	4.6108e-05	3.56188e-05	CCNB1/CDK1/PLK1/CCNB2	4
KEGG	hsa04914	Progesterone-mediated oocyte maturation	6	59	0.101695	100/8076	8.21724e-05	0.000333825	0.000210837	CCNA2/CCNB1/CDK1/MAD2L1/PLK1/CCNB2	6
CC	GO:0031970	organelle envelope lumen	4	124	0.0322581	88/19717	0.00231264	0.0118523	0.00862169	DTYMK/SNCA/CACYBP/TUBB	4
CC	GO:0016234	inclusion body	4	124	0.0322581	82/19717	0.00178546	0.00998232	0.00726142	MAPT/PRNP/SNCA/HDAC6	4
CC	GO:0043596	nuclear replication fork	4	124	0.0322581	41/19717	0.00012604	0.000837999	0.000609584	MCM3/PCNA/PRIM1/TIMELESS	4
CC	GO:0035371	microtubule plus-end	4	124	0.0322581	20/19717	6.67812e-06	6.31853e-05	4.59628e-05	CLIP1/CKAP5/MAPRE3/KIF18B	4
BP	GO:0070200	establishment of protein localization to telomere	4	122	0.0327869	16/18670	2.97241e-06	4.6108e-05	3.56188e-05	CCT6A/TCP1/CCT2/NABP2	4
BP	GO:1902969	mitotic DNA replication	4	122	0.0327869	15/18670	2.24062e-06	3.66492e-05	2.83118e-05	MCM2/MCM3/MCM6/GINS1	4
MF	GO:0017116	single-stranded DNA-dependent ATP-dependent DNA helicase activity	4	122	0.0327869	20/17697	9.56295e-06	0.000249466	0.000182675	MCM2/MCM6/RFC2/RFC5	4
MF	GO:0043142	single-stranded DNA-dependent ATPase activity	4	122	0.0327869	20/17697	9.56295e-06	0.000249466	0.000182675	MCM2/MCM6/RFC2/RFC5	4
MF	GO:0004003	ATP-dependent DNA helicase activity	4	122	0.0327869	21/17697	1.17502e-05	0.000249466	0.000182675	MCM2/MCM6/RFC2/RFC5	4
MF	GO:0008026	ATP-dependent helicase activity	4	122	0.0327869	21/17697	1.17502e-05	0.000249466	0.000182675	MCM2/MCM6/RFC2/RFC5	4
MF	GO:0070035	purine NTP-dependent helicase activity	4	122	0.0327869	21/17697	1.17502e-05	0.000249466	0.000182675	MCM2/MCM6/RFC2/RFC5	4
BP	GO:0090231	regulation of spindle checkpoint	4	122	0.0327869	14/18670	1.65146e-06	2.88484e-05	2.22857e-05	CCNB1/MAD2L1/NDC80/CDT1	4
BP	GO:0090266	regulation of mitotic cell cycle spindle assembly checkpoint	4	122	0.0327869	14/18670	1.65146e-06	2.88484e-05	2.22857e-05	CCNB1/MAD2L1/NDC80/CDT1	4
BP	GO:1903504	regulation of mitotic spindle checkpoint	4	122	0.0327869	14/18670	1.65146e-06	2.88484e-05	2.22857e-05	CCNB1/MAD2L1/NDC80/CDT1	4
CC	GO:0098687	chromosomal region	30	124	0.241935	349/19717	9.19424e-26	1.13089e-23	8.22643e-24	CCNB1/CDK1/CENPA/CHEK1/FEN1/CENPI/INCENP/MAD2L1/MCM2/MCM3/MCM6/PCNA/PLK1/CLIP1/SUV39H1/AURKB/CKAP5/NDC80/ZWINT/HJURP/SPC25/NCAPG/DCLRE1B/NABP2/CENPO/CDT1/CENPL/CDCA5/SKA1/SKA2	30
BP	GO:0007077	mitotic nuclear envelope disassembly	4	122	0.0327869	12/18670	8.24965e-07	1.53808e-05	1.18818e-05	CCNB1/CDK1/PLK1/CCNB2	4
BP	GO:0000727	double-strand break repair via break-induced replication	4	122	0.0327869	11/18670	5.52769e-07	1.06121e-05	8.19792e-06	MCM2/MCM3/MCM6/CDC7	4
MF	GO:0003774	motor activity	8	122	0.0655738	136/17697	4.56467e-06	0.000164682	0.000120591	KIF2A/KIF5B/KIF11/KIFC1/KIF23/KIF20A/KIF4A/KIF18B	8
MF	GO:0035173	histone kinase activity	4	122	0.0327869	17/17697	4.7734e-06	0.000164682	0.000120591	CCNB1/CDK1/CHEK1/AURKB	4
CC	GO:0032153	cell division site	3	124	0.0241935	68/19717	0.00903879	0.0365157	0.0265626	KIF20A/TUBGCP2/RACGAP1	3
CC	GO:0032155	cell division site part	3	124	0.0241935	63/19717	0.00732639	0.0305473	0.022221	KIF20A/TUBGCP2/RACGAP1	3
BP	GO:0051255	spindle midzone assembly	4	122	0.0327869	10/18670	3.53548e-07	7.14094e-06	5.51644e-06	AURKB/KIF23/KIF4A/RACGAP1	4
BP	GO:2000377	regulation of reactive oxygen species metabolic process	5	122	0.0409836	195/18670	0.00915004	0.0497915	0.0384643	DHFR/FOXM1/MAPT/SNCA/HDAC6	5
BP	GO:0051168	nuclear export	5	122	0.0409836	194/18670	0.00896114	0.0490588	0.0378983	RAN/KHDRBS1/RNPS1/GTSE1/LTV1	5
KEGG	hsa04114	Oocyte meiosis	7	59	0.118644	129/8076	3.85497e-05	0.000167049	0.000105504	CCNB1/CDK1/MAD2L1/PLK1/YWHAZ/CCNB2/FBXO5	7
BP	GO:0050657	nucleic acid transport	5	122	0.0409836	193/18670	0.00877496	0.0483371	0.0373408	RAN/CKAP5/KHDRBS1/RNPS1/LTV1	5
BP	GO:0050658	RNA transport	5	122	0.0409836	193/18670	0.00877496	0.0483371	0.0373408	RAN/CKAP5/KHDRBS1/RNPS1/LTV1	5
BP	GO:0051099	positive regulation of binding	5	122	0.0409836	179/18670	0.00644279	0.0369901	0.0285752	STMN1/RAN/MAPRE3/CDT1/CDCA5	5
BP	GO:0090316	positive regulation of intracellular protein transport	5	122	0.0409836	153/18670	0.00332706	0.0210823	0.0162863	KIF5B/PRNP/RAN/SAE1/GTSE1	5
BP	GO:1902904	negative regulation of supramolecular fiber organization	5	122	0.0409836	142/18670	0.00241213	0.016531	0.0127704	STMN1/SNCA/HDAC6/CKAP2/CAMSAP1	5
BP	GO:0030010	establishment of cell polarity	5	122	0.0409836	135/18670	0.00193499	0.0138448	0.0106953	CENPA/CFL1/MAD2L1/PLK1/NDC80	5
MF	GO:0016887	ATPase activity	13	122	0.106557	384/17697	2.50489e-06	0.000115225	8.43752e-05	KIF2A/KIF5B/KIF11/KIFC1/MCM2/MCM6/RFC2/RFC5/KIF23/ABCF2/KIF20A/KIF4A/KIF18B	13
BP	GO:0071156	regulation of cell cycle arrest	5	122	0.0409836	108/18670	0.000715266	0.00571245	0.00441292	CCNB1/CDK1/FOXM1/PCNA/GTSE1	5
CC	GO:1904115	axon cytoplasm	3	124	0.0241935	57/19717	0.00554737	0.0243688	0.0177265	KIF5B/MAPT/KIF4A	3
BP	GO:0030330	DNA damage response, signal transduction by p53 class mediator	5	122	0.0409836	107/18670	0.000685692	0.00551683	0.0042618	CCNB1/CDK1/FOXM1/PCNA/GTSE1	5
BP	GO:0044774	mitotic DNA integrity checkpoint	5	122	0.0409836	106/18670	0.000657043	0.00533057	0.00411791	CCNB1/CDK1/PCNA/GTSE1/CLSPN	5
BP	GO:0002504	antigen processing and presentation of peptide or polysaccharide antigen via MHC class II	5	122	0.0409836	102/18670	0.000551324	0.00460783	0.00355959	KIF2A/KIF11/KIF23/KIF4A/RACGAP1	5
KEGG	hsa03430	Mismatch repair	4	59	0.0677966	23/8076	2.05125e-05	9.52366e-05	6.01495e-05	PCNA/RFC2/RFC5/EXO1	4
BP	GO:0002495	antigen processing and presentation of peptide antigen via MHC class II	5	122	0.0409836	101/18670	0.000527021	0.00442378	0.00341741	KIF2A/KIF11/KIF23/KIF4A/RACGAP1	5
BP	GO:0019886	antigen processing and presentation of exogenous peptide antigen via MHC class II	5	122	0.0409836	98/18670	0.000458929	0.00395494	0.00305523	KIF2A/KIF11/KIF23/KIF4A/RACGAP1	5
BP	GO:0044773	mitotic DNA damage checkpoint	5	122	0.0409836	97/18670	0.000437777	0.0037931	0.0029302	CCNB1/CDK1/PCNA/GTSE1/CLSPN	5
BP	GO:0010972	negative regulation of G2/M transition of mitotic cell cycle	5	122	0.0409836	93/18670	0.000360434	0.00323557	0.0024995	CDK1/PSMB2/AURKB/PSMD14/CLSPN	5
BP	GO:0001578	microtubule bundle formation	5	122	0.0409836	91/18670	0.000325883	0.00296661	0.00229173	DCX/PLK1/CLIP1/PRC1/KIF20A	5
CC	GO:0005720	nuclear heterochromatin	3	124	0.0241935	35/19717	0.00137179	0.00784793	0.0057088	CENPA/TCP1/UHRF1	3
BP	GO:0006890	retrograde vesicle-mediated transport, Golgi to ER	5	122	0.0409836	86/18670	0.000250462	0.00234611	0.00181239	KIF2A/KIF11/KIF23/KIF4A/RACGAP1	5
BP	GO:0010833	telomere maintenance via telomere lengthening	5	122	0.0409836	82/18670	0.000200347	0.00194236	0.00150049	CCT6A/TCP1/AURKB/CCT2/DCLRE1B	5
KEGG	hsa04115	p53 signaling pathway	6	59	0.101695	73/8076	1.36639e-05	6.83196e-05	4.31492e-05	CCNB1/CDK1/CHEK1/RRM2/CCNB2/GTSE1	6
BP	GO:0032204	regulation of telomere maintenance	5	122	0.0409836	81/18670	0.00018911	0.00187084	0.00144524	CCT6A/TCP1/AURKB/CCT2/NABP2	5
BP	GO:0051310	metaphase plate congression	5	122	0.0409836	57/18670	3.50129e-05	0.000408976	0.000315937	CCNB1/KIFC1/NDC80/CDT1/CDCA5	5
KEGG	hsa05132	Salmonella infection	10	59	0.169492	249/8076	1.07624e-05	5.82961e-05	3.68186e-05	KIF5B/TUBB2A/TUBA1A/TUBB3/TUBB4B/TUBB1/TUBB6/TUBA1C/TUBB/TUBB2B	10
BP	GO:0032206	positive regulation of telomere maintenance	5	122	0.0409836	51/18670	2.02667e-05	0.00025353	0.000195854	CCT6A/TCP1/AURKB/CCT2/NABP2	5
BP	GO:0051653	spindle localization	5	122	0.0409836	48/18670	1.50059e-05	0.000191424	0.000147876	CENPA/MAD2L1/PLK1/NDC80/NUSAP1	5
BP	GO:0007080	mitotic metaphase plate congression	5	122	0.0409836	44/18670	9.71788e-06	0.000129952	0.000100389	CCNB1/KIFC1/NDC80/CDT1/CDCA5	5
BP	GO:0051293	establishment of spindle localization	5	122	0.0409836	43/18670	8.65862e-06	0.000118233	9.13359e-05	CENPA/MAD2L1/PLK1/NDC80/NUSAP1	5
BP	GO:0016572	histone phosphorylation	5	122	0.0409836	38/18670	4.63433e-06	6.80755e-05	5.2589e-05	CCNA2/CCNB1/CDK1/CHEK1/AURKB	5
BP	GO:0031111	negative regulation of microtubule polymerization or depolymerization	5	122	0.0409836	37/18670	4.04561e-06	5.98812e-05	4.62588e-05	STMN1/SNCA/HDAC6/CKAP2/CAMSAP1	5
BP	GO:0045740	positive regulation of DNA replication	5	122	0.0409836	36/18670	3.51722e-06	5.32804e-05	4.11596e-05	CDK1/PCNA/CDC7/CACYBP/CDT1	5
BP	GO:0040001	establishment of mitotic spindle localization	5	122	0.0409836	33/18670	2.24923e-06	3.66492e-05	2.83118e-05	CENPA/MAD2L1/PLK1/NDC80/NUSAP1	5
BP	GO:0008608	attachment of spindle microtubules to kinetochore	5	122	0.0409836	32/18670	1.91843e-06	3.23464e-05	2.49879e-05	CCNB1/AURKB/NDC80/RACGAP1/CDT1	5
BP	GO:1901976	regulation of cell cycle checkpoint	5	122	0.0409836	32/18670	1.91843e-06	3.23464e-05	2.49879e-05	CCNB1/MAD2L1/NDC80/WDR76/CDT1	5
BP	GO:0071459	protein localization to chromosome, centromeric region	5	122	0.0409836	21/18670	2.05327e-07	4.32748e-06	3.34302e-06	CDK1/CENPA/AURKB/NDC80/CDT1	5
BP	GO:0006271	DNA strand elongation involved in DNA replication	5	122	0.0409836	20/18670	1.5726e-07	3.38807e-06	2.61731e-06	FEN1/MCM3/PCNA/GINS1/RNASEH2A	5
BP	GO:0051231	spindle elongation	5	122	0.0409836	10/18670	2.69337e-09	9.16219e-08	7.07788e-08	PRC1/AURKB/KIF23/KIF4A/RACGAP1	5
BP	GO:0007050	cell cycle arrest	6	122	0.0491803	237/18670	0.00467395	0.0279716	0.0216083	CCNB1/CDK1/FOXM1/PCNA/PRNP/GTSE1	6
BP	GO:0000302	response to reactive oxygen species	6	122	0.0491803	232/18670	0.00421602	0.0254669	0.0196734	CCNA2/CDK1/DHFR/MAPT/PCNA/HDAC6	6
BP	GO:0050803	regulation of synapse structure or activity	6	122	0.0491803	227/18670	0.00379219	0.0231729	0.0179013	CFL1/PRNP/SNCA/YWHAZ/TUBA1A/TUBB	6
BP	GO:0032271	regulation of protein polymerization	6	122	0.0491803	218/18670	0.00311017	0.0201008	0.0155281	STMN1/MAPT/CLIP1/SNCA/MAPRE3/CAMSAP1	6
BP	GO:0050807	regulation of synapse organization	6	122	0.0491803	218/18670	0.00311017	0.0201008	0.0155281	CFL1/PRNP/SNCA/YWHAZ/TUBA1A/TUBB	6
BP	GO:0071241	cellular response to inorganic substance	6	122	0.0491803	217/18670	0.00304049	0.0199173	0.0153863	CCNA2/CCNB1/PRNP/SNCA/TIMELESS/CACYBP	6
BP	GO:0032388	positive regulation of intracellular transport	6	122	0.0491803	215/18670	0.00290465	0.0191569	0.0147989	KIF5B/PRNP/RAN/SAE1/KHDRBS1/GTSE1	6
BP	GO:0007163	establishment or maintenance of cell polarity	6	122	0.0491803	210/18670	0.00258496	0.0175868	0.0135859	CENPA/CFL1/MAD2L1/PLK1/CKAP5/NDC80	6
CC	GO:0030894	replisome	3	124	0.0241935	26/19717	0.000567876	0.00349243	0.0025405	MCM3/PCNA/PRIM1	3
BP	GO:0031099	regeneration	6	122	0.0491803	198/18670	0.00192582	0.0138303	0.010684	CCNA2/CCNB1/CDK1/DHFR/PCNA/TYMS	6
BP	GO:0034614	cellular response to reactive oxygen species	6	122	0.0491803	168/18670	0.00083009	0.00643198	0.00496876	CCNA2/CDK1/DHFR/MAPT/PCNA/HDAC6	6
MF	GO:0140097	catalytic activity, acting on DNA	11	122	0.0901639	213/17697	2.58888e-07	1.42906e-05	1.04645e-05	FEN1/MCM2/MCM3/MCM6/PCNA/RFC2/RFC5/EXO1/GINS1/POLE3/DCLRE1B	11
BP	GO:0051494	negative regulation of cytoskeleton organization	6	122	0.0491803	148/18670	0.00042593	0.00374128	0.00289017	CCNF/STMN1/SNCA/HDAC6/CKAP2/CAMSAP1	6
BP	GO:0032392	DNA geometric change	6	122	0.0491803	119/18670	0.000130815	0.00134921	0.00104227	MCM2/MCM3/MCM6/RFC2/RFC5/GINS1	6
CC	GO:0101031	chaperone complex	3	124	0.0241935	22/19717	0.000342587	0.00216093	0.00157193	CCT6A/TCP1/CCT2	3
BP	GO:0032508	DNA duplex unwinding	6	122	0.0491803	110/18670	8.46876e-05	0.000907233	0.000700846	MCM2/MCM3/MCM6/RFC2/RFC5/GINS1	6
BP	GO:2000278	regulation of DNA biosynthetic process	6	122	0.0491803	108/18670	7.64674e-05	0.000828326	0.000639889	CCT6A/RFC2/RFC5/TCP1/AURKB/CCT2	6
BP	GO:1904029	regulation of cyclin-dependent protein kinase activity	6	122	0.0491803	106/18670	6.88964e-05	0.000753341	0.000581963	CCNA2/CCNB1/CCNF/PLK1/CCNB2/MAPRE3	6
CC	GO:0000930	gamma-tubulin complex	3	124	0.0241935	21/19717	0.000297232	0.00192419	0.00139971	CKAP5/TUBGCP2/CENPJ	3
CC	GO:0042555	MCM complex	3	124	0.0241935	12/19717	5.12434e-05	0.000360168	0.000261996	MCM2/MCM3/MCM6	3
BP	GO:0000079	regulation of cyclin-dependent protein serine/threonine kinase activity	6	122	0.0491803	102/18670	5.55493e-05	0.000626221	0.000483761	CCNA2/CCNB1/CCNF/PLK1/CCNB2/MAPRE3	6
BP	GO:0043044	ATP-dependent chromatin remodeling	6	122	0.0491803	88/18670	2.40809e-05	0.000299314	0.000231223	CENPA/CENPI/POLE3/HJURP/CENPO/CENPL	6
KEGG	hsa04145	Phagosome	9	59	0.152542	152/8076	1.31643e-06	9.43048e-06	5.95609e-06	TUBB2A/TUBA1A/TUBB3/TUBB4B/TUBB1/TUBB6/TUBA1C/TUBB/TUBB2B	9
KEGG	hsa05130	Pathogenic Escherichia coli infection	10	59	0.169492	197/8076	1.31817e-06	9.43048e-06	5.95609e-06	TUBB2A/TUBA1A/ABCF2/TUBB3/TUBB4B/TUBB1/TUBB6/TUBA1C/TUBB/TUBB2B	10
KEGG	hsa05014	Amyotrophic lateral sclerosis	13	59	0.220339	364/8076	1.57007e-06	9.43048e-06	5.95609e-06	KIF5B/PSMB2/TUBB2A/TUBA1A/HDAC6/PSMD14/TUBB3/TUBB4B/TUBB1/TUBB6/TUBA1C/TUBB/TUBB2B	13
KEGG	hsa05016	Huntington disease	12	59	0.20339	306/8076	1.59593e-06	9.43048e-06	5.95609e-06	KIF5B/PSMB2/TUBB2A/TUBA1A/PSMD14/TUBB3/TUBB4B/TUBB1/TUBB6/TUBA1C/TUBB/TUBB2B	12
KEGG	hsa05022	Pathways of neurodegeneration - multiple diseases	15	59	0.254237	475/8076	1.01002e-06	9.37874e-06	5.92341e-06	KIF5B/MAPT/PRNP/PSMB2/SNCA/TUBB2A/TUBA1A/PSMD14/TUBB3/TUBB4B/TUBB1/TUBB6/TUBA1C/TUBB/TUBB2B	15
MF	GO:0003777	microtubule motor activity	8	122	0.0655738	84/17697	1.13911e-07	7.85988e-06	5.75552e-06	KIF2A/KIF5B/KIF11/KIFC1/KIF23/KIF20A/KIF4A/KIF18B	8
BP	GO:0050000	chromosome localization	6	122	0.0491803	76/18670	1.0354e-05	0.000137509	0.000106227	CCNB1/KIFC1/DLGAP5/NDC80/CDT1/CDCA5	6
BP	GO:0051303	establishment of chromosome localization	6	122	0.0491803	75/18670	9.58739e-06	0.000129097	9.97285e-05	CCNB1/KIFC1/DLGAP5/NDC80/CDT1/CDCA5	6
BP	GO:0072395	signal transduction involved in cell cycle checkpoint	6	122	0.0491803	74/18670	8.86742e-06	0.000120237	9.28843e-05	CCNB1/CDK1/CHEK1/PCNA/PLK1/GTSE1	6
BP	GO:0072401	signal transduction involved in DNA integrity checkpoint	6	122	0.0491803	73/18670	8.19187e-06	0.000112653	8.70253e-05	CCNB1/CDK1/CHEK1/PCNA/PLK1/GTSE1	6
BP	GO:0072422	signal transduction involved in DNA damage checkpoint	6	122	0.0491803	73/18670	8.19187e-06	0.000112653	8.70253e-05	CCNB1/CDK1/CHEK1/PCNA/PLK1/GTSE1	6
BP	GO:2000573	positive regulation of DNA biosynthetic process	6	122	0.0491803	67/18670	4.9581e-06	7.15285e-05	5.52564e-05	CCT6A/RFC2/RFC5/TCP1/AURKB/CCT2	6
BP	GO:0043486	histone exchange	6	122	0.0491803	60/18670	2.58168e-06	4.13709e-05	3.19594e-05	CENPA/CENPI/POLE3/HJURP/CENPO/CENPL	6
CC	GO:0005652	nuclear lamina	3	124	0.0241935	11/19717	3.86099e-05	0.000279544	0.000203348	LMNB1/PCNA/SUV39H1	3
MF	GO:0005200	structural constituent of cytoskeleton	9	122	0.0737705	102/17697	3.49063e-08	3.21138e-06	2.35158e-06	TUBB2A/TUBA1A/TUBB3/TUBB4B/TUBB1/TUBB6/TUBA1C/TUBB/TUBB2B	9
BP	GO:0034508	centromere complex assembly	6	122	0.0491803	56/18670	1.71036e-06	2.96105e-05	2.28744e-05	CENPA/CENPI/POLE3/HJURP/CENPO/CENPL	6
CC	GO:0005832	chaperonin-containing T-complex	3	124	0.0241935	11/19717	3.86099e-05	0.000279544	0.000203348	CCT6A/TCP1/CCT2	3
BP	GO:0034724	DNA replication-independent nucleosome organization	6	122	0.0491803	55/18670	1.53525e-06	2.75635e-05	2.12931e-05	CENPA/CENPI/POLE3/HJURP/CENPO/CENPL	6
KEGG	hsa05010	Alzheimer disease	14	59	0.237288	369/8076	2.7504e-07	2.9796e-06	1.88185e-06	KIF5B/MAPT/PSMB2/SNCA/TUBB2A/TUBA1A/PSMD14/TUBB3/TUBB4B/TUBB1/TUBB6/TUBA1C/TUBB/TUBB2B	14
BP	GO:0006336	DNA replication-independent nucleosome assembly	6	122	0.0491803	54/18670	1.37507e-06	2.49184e-05	1.92497e-05	CENPA/CENPI/POLE3/HJURP/CENPO/CENPL	6
BP	GO:0090329	regulation of DNA-dependent DNA replication	6	122	0.0491803	54/18670	1.37507e-06	2.49184e-05	1.92497e-05	RFC2/RFC5/CDC7/TIMELESS/FBXO5/CDT1	6
BP	GO:0031113	regulation of microtubule polymerization	6	122	0.0491803	50/18670	8.64257e-07	1.59599e-05	1.23292e-05	STMN1/MAPT/CLIP1/SNCA/MAPRE3/CAMSAP1	6
BP	GO:0031055	chromatin remodeling at centromere	6	122	0.0491803	48/18670	6.74566e-07	1.28234e-05	9.90616e-06	CENPA/CENPI/POLE3/HJURP/CENPO/CENPL	6
BP	GO:0034080	CENP-A containing nucleosome assembly	6	122	0.0491803	44/18670	3.96394e-07	7.84294e-06	6.05874e-06	CENPA/CENPI/POLE3/HJURP/CENPO/CENPL	6
BP	GO:0061641	CENP-A containing chromatin organization	6	122	0.0491803	44/18670	3.96394e-07	7.84294e-06	6.05874e-06	CENPA/CENPI/POLE3/HJURP/CENPO/CENPL	6
BP	GO:0006270	DNA replication initiation	6	122	0.0491803	37/18670	1.35508e-07	2.95225e-06	2.28064e-06	MCM2/MCM3/MCM6/PRIM1/POLE3/CDT1	6
BP	GO:0007094	mitotic spindle assembly checkpoint	6	122	0.0491803	34/18670	7.96561e-08	1.8171e-06	1.40372e-06	CCNB1/MAD2L1/PLK1/AURKB/NDC80/CDT1	6
BP	GO:0031577	spindle checkpoint	6	122	0.0491803	34/18670	7.96561e-08	1.8171e-06	1.40372e-06	CCNB1/MAD2L1/PLK1/AURKB/NDC80/CDT1	6
KEGG	hsa05020	Prion disease	13	59	0.220339	273/8076	5.69273e-08	7.40054e-07	4.67403e-07	KIF5B/PRNP/PSMB2/TUBB2A/TUBA1A/PSMD14/TUBB3/TUBB4B/TUBB1/TUBB6/TUBA1C/TUBB/TUBB2B	13
BP	GO:0071173	spindle assembly checkpoint	6	122	0.0491803	34/18670	7.96561e-08	1.8171e-06	1.40372e-06	CCNB1/MAD2L1/PLK1/AURKB/NDC80/CDT1	6
BP	GO:0071174	mitotic spindle checkpoint	6	122	0.0491803	34/18670	7.96561e-08	1.8171e-06	1.40372e-06	CCNB1/MAD2L1/PLK1/AURKB/NDC80/CDT1	6
BP	GO:0000083	regulation of transcription involved in G1/S transition of mitotic cell cycle	6	122	0.0491803	29/18670	2.88948e-08	7.00337e-07	5.41017e-07	DHFR/PCNA/RRM2/TYMS/FBXO5/CDT1	6
BP	GO:0022616	DNA strand elongation	6	122	0.0491803	27/18670	1.8199e-08	4.58283e-07	3.54028e-07	FEN1/MCM3/PCNA/GINS1/RNASEH2A/DCLRE1B	6
BP	GO:0032201	telomere maintenance via semi-conservative replication	6	122	0.0491803	27/18670	1.8199e-08	4.58283e-07	3.54028e-07	FEN1/PCNA/PRIM1/RFC2/RFC5/POLE3	6
BP	GO:1903311	regulation of mRNA metabolic process	7	122	0.057377	324/18670	0.00543876	0.0315741	0.0243913	CCNB1/PSMB2/YWHAZ/PSMD14/HNRNPR/KHDRBS1/RNPS1	7
CC	GO:0005819	spindle	28	124	0.225806	347/19717	2.7225e-23	2.23245e-21	1.62395e-21	CCNB1/CDK1/INCENP/KIF2A/KIF11/KIFC1/MAD2L1/PLK1/CDC7/PRC1/AURKB/KIF23/DLGAP5/CKAP5/KIF20A/TUBGCP2/MAPRE3/TPX2/KIF4A/FBXO5/CKAP2/RACGAP1/NUSAP1/SHCBP1/KIF18B/CKAP2L/SKA1/SKA2	28
BP	GO:0019882	antigen processing and presentation	7	122	0.057377	226/18670	0.000715897	0.00571245	0.00441292	KIF2A/KIF11/PSMB2/KIF23/PSMD14/KIF4A/RACGAP1	7
BP	GO:2001020	regulation of response to DNA damage stimulus	7	122	0.057377	214/18670	0.00051827	0.00440757	0.00340488	CHEK1/FOXM1/MAPT/PCNA/TIMELESS/FBXO5/WDR76	7
CC	GO:0000793	condensed chromosome	21	124	0.169355	223/19717	5.47417e-19	2.69329e-17	1.95918e-17	CCNB1/CENPA/CHEK1/INCENP/MAD2L1/PLK1/SUV39H1/AURKB/CKAP5/NDC80/ZWINT/NCAPH/NCAPG2/HJURP/SPC25/NCAPG/CENPO/CDT1/CDCA5/SKA1/SKA2	21
BP	GO:0048002	antigen processing and presentation of peptide antigen	7	122	0.057377	189/18670	0.00024506	0.00230666	0.00178191	KIF2A/KIF11/PSMB2/KIF23/PSMD14/KIF4A/RACGAP1	7
BP	GO:0006338	chromatin remodeling	7	122	0.057377	182/18670	0.000194507	0.00189522	0.00146407	CENPA/CHEK1/CENPI/POLE3/HJURP/CENPO/CENPL	7
BP	GO:0019884	antigen processing and presentation of exogenous antigen	7	122	0.057377	182/18670	0.000194507	0.00189522	0.00146407	KIF2A/KIF11/PSMB2/KIF23/PSMD14/KIF4A/RACGAP1	7
BP	GO:0030705	cytoskeleton-dependent intracellular transport	7	122	0.057377	180/18670	0.000181731	0.00180706	0.00139597	KIF5B/MAPT/TUBA1A/KIF23/KIF4A/TUBA1C/TUBB	7
BP	GO:1901796	regulation of signal transduction by p53 class mediator	7	122	0.057377	180/18670	0.000181731	0.00180706	0.00139597	CHEK1/RFC2/RFC5/SSRP1/EXO1/AURKB/TPX2	7
CC	GO:0000775	chromosome, centromeric region	21	124	0.169355	193/19717	2.61922e-20	1.61082e-18	1.17176e-18	CCNB1/CENPA/CENPI/INCENP/MAD2L1/PLK1/CLIP1/SUV39H1/AURKB/CKAP5/NDC80/ZWINT/HJURP/SPC25/NCAPG/CENPO/CDT1/CENPL/CDCA5/SKA1/SKA2	21
CC	GO:0043601	nuclear replisome	2	124	0.016129	24/19717	0.00989188	0.0380219	0.0276582	MCM3/PRIM1	2
BP	GO:0022406	membrane docking	7	122	0.057377	178/18670	0.000169643	0.00170434	0.00131662	CDK1/PLK1/TUBA1A/CKAP5/TUBB4B/CENPJ/TUBB	7
BP	GO:0002478	antigen processing and presentation of exogenous peptide antigen	7	122	0.057377	175/18670	0.000152739	0.00155058	0.00119783	KIF2A/KIF11/PSMB2/KIF23/PSMD14/KIF4A/RACGAP1	7
BP	GO:0140056	organelle localization by membrane tethering	7	122	0.057377	169/18670	0.000123018	0.00127557	0.000985392	CDK1/PLK1/TUBA1A/CKAP5/TUBB4B/CENPJ/TUBB	7
BP	GO:0031023	microtubule organizing center organization	7	122	0.057377	133/18670	2.69553e-05	0.000330631	0.000255415	CCNF/CDK1/CHEK1/KIF11/PLK1/CKAP5/CENPJ	7
BP	GO:0042770	signal transduction in response to DNA damage	7	122	0.057377	133/18670	2.69553e-05	0.000330631	0.000255415	CCNB1/CDK1/CHEK1/FOXM1/PCNA/PLK1/GTSE1	7
BP	GO:0007098	centrosome cycle	7	122	0.057377	124/18670	1.71198e-05	0.000216963	0.000167606	CCNF/CDK1/CHEK1/KIF11/PLK1/CKAP5/CENPJ	7
BP	GO:1900180	regulation of protein localization to nucleus	7	122	0.057377	116/18670	1.10708e-05	0.000146029	0.000112809	CCT6A/CDK1/PLK1/RAN/TCP1/CCT2/GTSE1	7
BP	GO:1901989	positive regulation of cell cycle phase transition	7	122	0.057377	106/18670	6.10614e-06	8.51785e-05	6.58012e-05	CCNB1/CDK1/CDC7/DLGAP5/FBXO5/CDT1/CDCA5	7
BP	GO:1902750	negative regulation of cell cycle G2/M phase transition	7	122	0.057377	105/18670	5.73369e-06	8.08529e-05	6.24596e-05	CDK1/CHEK1/PLK1/PSMB2/AURKB/PSMD14/CLSPN	7
BP	GO:0097711	ciliary basal body-plasma membrane docking	7	122	0.057377	95/18670	2.93764e-06	4.6108e-05	3.56188e-05	CDK1/PLK1/TUBA1A/CKAP5/TUBB4B/CENPJ/TUBB	7
BP	GO:1901992	positive regulation of mitotic cell cycle phase transition	7	122	0.057377	91/18670	2.19864e-06	3.64372e-05	2.81481e-05	CCNB1/CDK1/CDC7/DLGAP5/FBXO5/CDT1/CDCA5	7
BP	GO:0032465	regulation of cytokinesis	7	122	0.057377	89/18670	1.89194e-06	3.23464e-05	2.49879e-05	INCENP/PLK1/PRC1/AURKB/KIF23/KIF20A/RACGAP1	7
BP	GO:1900182	positive regulation of protein localization to nucleus	7	122	0.057377	74/18670	5.35735e-07	1.03879e-05	8.02474e-06	CCT6A/CDK1/PLK1/RAN/TCP1/CCT2/GTSE1	7
BP	GO:0030261	chromosome condensation	7	122	0.057377	47/18670	2.16584e-08	5.38405e-07	4.15923e-07	CCNB1/CDK1/NCAPH/NUSAP1/NCAPG2/NCAPG/CDCA5	7
BP	GO:0051985	negative regulation of chromosome segregation	7	122	0.057377	45/18670	1.57973e-08	4.08413e-07	3.15503e-07	CCNB1/MAD2L1/PLK1/AURKB/NDC80/FBXO5/CDT1	7
CC	GO:0005721	pericentric heterochromatin	2	124	0.016129	20/19717	0.00692209	0.0293592	0.0213567	CENPA/INCENP	2
BP	GO:0033046	negative regulation of sister chromatid segregation	7	122	0.057377	44/18670	1.34122e-08	3.56249e-07	2.75206e-07	CCNB1/MAD2L1/PLK1/AURKB/NDC80/FBXO5/CDT1	7
CC	GO:0031616	spindle pole centrosome	2	124	0.016129	15/19717	0.00390467	0.0177879	0.0129395	AURKB/DLGAP5	2
KEGG	hsa05012	Parkinson disease	14	59	0.237288	249/8076	1.8802e-09	3.05532e-08	1.92968e-08	KIF5B/MAPT/PSMB2/SNCA/TUBB2A/TUBA1A/PSMD14/TUBB3/TUBB4B/TUBB1/TUBB6/TUBA1C/TUBB/TUBB2B	14
BP	GO:0033048	negative regulation of mitotic sister chromatid segregation	7	122	0.057377	42/18670	9.54489e-09	2.57049e-07	1.98573e-07	CCNB1/MAD2L1/PLK1/AURKB/NDC80/FBXO5/CDT1	7
BP	GO:1905819	negative regulation of chromosome separation	7	122	0.057377	40/18670	6.66767e-09	1.87371e-07	1.44746e-07	CCNB1/MAD2L1/PLK1/AURKB/NDC80/FBXO5/CDT1	7
BP	GO:2000816	negative regulation of mitotic sister chromatid separation	7	122	0.057377	39/18670	5.53061e-09	1.62483e-07	1.25519e-07	CCNB1/MAD2L1/PLK1/AURKB/NDC80/FBXO5/CDT1	7
CC	GO:0010369	chromocenter	2	124	0.016129	14/19717	0.00339798	0.0157718	0.0114728	INCENP/AURKB	2
KEGG	hsa04540	Gap junction	10	59	0.169492	88/8076	5.68629e-10	1.23203e-08	7.78124e-09	CDK1/TUBB2A/TUBA1A/TUBB3/TUBB4B/TUBB1/TUBB6/TUBA1C/TUBB/TUBB2B	10
BP	GO:1902100	negative regulation of metaphase/anaphase transition of cell cycle	7	122	0.057377	37/18670	3.7422e-09	1.16378e-07	8.99029e-08	CCNB1/MAD2L1/PLK1/AURKB/NDC80/FBXO5/CDT1	7
BP	GO:0045841	negative regulation of mitotic metaphase/anaphase transition	7	122	0.057377	36/18670	3.05064e-09	9.85866e-08	7.61591e-08	CCNB1/MAD2L1/PLK1/AURKB/NDC80/FBXO5/CDT1	7
BP	GO:0050808	synapse organization	8	122	0.0655738	408/18670	0.005375	0.0314538	0.0242984	CFL1/MAPT/PRNP/SNCA/YWHAZ/TUBA1A/HDAC6/TUBB	8
BP	GO:0051098	regulation of binding	8	122	0.0655738	373/18670	0.00314446	0.0201008	0.0155281	STMN1/PLK1/RAN/AURKB/MAPRE3/HJURP/CDT1/CDCA5	8
BP	GO:0010038	response to metal ion	8	122	0.0655738	364/18670	0.00270945	0.0179918	0.0138989	CCNB1/CDK1/DTYMK/MAPT/PCNA/PRNP/SNCA/CACYBP	8
BP	GO:0034599	cellular response to oxidative stress	8	122	0.0655738	302/18670	0.000835925	0.00643198	0.00496876	CCNA2/CDK1/DHFR/MAPT/PCNA/SNCA/MELK/HDAC6	8
BP	GO:0090305	nucleic acid phosphodiester bond hydrolysis	8	122	0.0655738	302/18670	0.000835925	0.00643198	0.00496876	FEN1/PCNA/PPP1R8/RFC2/RFC5/EXO1/RNASEH2A/DCLRE1B	8
BP	GO:0031647	regulation of protein stability	8	122	0.0655738	284/18670	0.000560068	0.00464599	0.00358907	CCT6A/PLK1/PRNP/SNCA/TCP1/HDAC6/CCT2/GTSE1	8
BP	GO:0034504	protein localization to nucleus	8	122	0.0655738	262/18670	0.000328125	0.00297306	0.00229671	CCT6A/CDK1/KPNA2/PLK1/RAN/TCP1/CCT2/GTSE1	8
BP	GO:0006403	RNA localization	8	122	0.0655738	230/18670	0.000135517	0.00139031	0.00107402	CCT6A/RAN/TCP1/CKAP5/CCT2/KHDRBS1/RNPS1/LTV1	8
CC	GO:1990023	mitotic spindle midzone	2	124	0.016129	13/19717	0.00292456	0.0138354	0.0100643	AURKB/KIF18B	2
CC	GO:0000235	astral microtubule	2	124	0.016129	11/19717	0.00207923	0.0108828	0.00791644	MAPRE3/KIF18B	2
BP	GO:0006333	chromatin assembly or disassembly	8	122	0.0655738	191/18670	3.69041e-05	0.000425935	0.000329038	CENPA/CENPI/MCM2/CHAF1B/POLE3/HJURP/CENPO/CENPL	8
BP	GO:0034728	nucleosome organization	8	122	0.0655738	184/18670	2.82705e-05	0.000342603	0.000264664	CENPA/CENPI/MCM2/CHAF1B/POLE3/HJURP/CENPO/CENPL	8
BP	GO:0051302	regulation of cell division	8	122	0.0655738	168/18670	1.46707e-05	0.000188387	0.000145531	INCENP/PLK1/PRC1/AURKB/KIF23/KIF20A/RACGAP1/KIF18B	8
BP	GO:0031497	chromatin assembly	8	122	0.0655738	165/18670	1.28693e-05	0.000166358	0.000128513	CENPA/CENPI/MCM2/CHAF1B/POLE3/HJURP/CENPO/CENPL	8
BP	GO:0000077	DNA damage checkpoint	8	122	0.0655738	145/18670	4.98007e-06	7.15285e-05	5.52564e-05	CCNB1/CDK1/CHEK1/PCNA/PLK1/GTSE1/CLSPN/WDR76	8
BP	GO:0006334	nucleosome assembly	8	122	0.0655738	145/18670	4.98007e-06	7.15285e-05	5.52564e-05	CENPA/CENPI/MCM2/CHAF1B/POLE3/HJURP/CENPO/CENPL	8
BP	GO:0033047	regulation of mitotic sister chromatid segregation	8	122	0.0655738	68/18670	1.40466e-08	3.68058e-07	2.84328e-07	CCNB1/MAD2L1/PLK1/AURKB/DLGAP5/NDC80/FBXO5/CDT1	8
BP	GO:1905818	regulation of chromosome separation	8	122	0.0655738	62/18670	6.63797e-09	1.87371e-07	1.44746e-07	CCNB1/MAD2L1/PLK1/AURKB/DLGAP5/NDC80/FBXO5/CDT1	8
BP	GO:0051306	mitotic sister chromatid separation	8	122	0.0655738	60/18670	5.07817e-09	1.51486e-07	1.17024e-07	CCNB1/MAD2L1/PLK1/AURKB/DLGAP5/NDC80/FBXO5/CDT1	8
KEGG	hsa04110	Cell cycle	13	59	0.220339	124/8076	3.10558e-12	1.00931e-10	6.37461e-11	CCNA2/CCNB1/CDK1/CHEK1/MAD2L1/MCM2/MCM3/MCM6/PCNA/PLK1/YWHAZ/CDC7/CCNB2	13
BP	GO:0051784	negative regulation of nuclear division	8	122	0.0655738	60/18670	5.07817e-09	1.51486e-07	1.17024e-07	CCNB1/CHEK1/MAD2L1/PLK1/AURKB/NDC80/FBXO5/CDT1	8
BP	GO:0010965	regulation of mitotic sister chromatid separation	8	122	0.0655738	57/18670	3.33354e-09	1.05963e-07	8.18572e-08	CCNB1/MAD2L1/PLK1/AURKB/DLGAP5/NDC80/FBXO5/CDT1	8
BP	GO:0044784	metaphase/anaphase transition of cell cycle	8	122	0.0655738	56/18670	2.8813e-09	9.46922e-08	7.31506e-08	CCNB1/MAD2L1/PLK1/AURKB/DLGAP5/NDC80/FBXO5/CDT1	8
BP	GO:0007091	metaphase/anaphase transition of mitotic cell cycle	8	122	0.0655738	54/18670	2.13354e-09	7.661e-08	5.91819e-08	CCNB1/MAD2L1/PLK1/AURKB/DLGAP5/NDC80/FBXO5/CDT1	8
BP	GO:1902099	regulation of metaphase/anaphase transition of cell cycle	8	122	0.0655738	53/18670	1.82738e-09	6.68544e-08	5.16456e-08	CCNB1/MAD2L1/PLK1/AURKB/DLGAP5/NDC80/FBXO5/CDT1	8
BP	GO:0045839	negative regulation of mitotic nuclear division	8	122	0.0655738	52/18670	1.56001e-09	5.81703e-08	4.49371e-08	CCNB1/CHEK1/MAD2L1/PLK1/AURKB/NDC80/FBXO5/CDT1	8
BP	GO:0030071	regulation of mitotic metaphase/anaphase transition	8	122	0.0655738	51/18670	1.32721e-09	5.04599e-08	3.89807e-08	CCNB1/MAD2L1/PLK1/AURKB/DLGAP5/NDC80/FBXO5/CDT1	8
BP	GO:0007019	microtubule depolymerization	8	122	0.0655738	44/18670	3.83745e-10	1.51853e-08	1.17308e-08	KIF2A/STMN1/CKAP5/HDAC6/CKAP2/STMN4/KIF18B/CAMSAP1	8
BP	GO:0043254	regulation of protein complex assembly	9	122	0.0737705	467/18670	0.00358121	0.0223999	0.0173041	STMN1/MAPT/CLIP1/SNCA/HDAC6/MAPRE3/HJURP/CDT1/CAMSAP1	9
KEGG	hsa03030	DNA replication	10	59	0.169492	36/8076	4.27508e-14	2.7788e-12	1.75503e-12	FEN1/MCM2/MCM3/MCM6/PCNA/PRIM1/RFC2/RFC5/RNASEH2A/POLE3	10
BP	GO:0006979	response to oxidative stress	9	122	0.0737705	451/18670	0.00284556	0.0188312	0.0145473	CCNA2/CDK1/DHFR/MAPT/PCNA/PRNP/SNCA/MELK/HDAC6	9
BP	GO:0006401	RNA catabolic process	9	122	0.0737705	397/18670	0.00119673	0.00885672	0.0068419	FEN1/PPP1R8/PSMB2/YWHAZ/PSMD14/HNRNPR/RNASEH2A/RNPS1/MRTO4	9
BP	GO:0044782	cilium organization	9	122	0.0737705	384/18670	0.000948724	0.00718585	0.00555113	CDK1/DCX/PLK1/TUBA1A/CKAP5/HDAC6/TUBB4B/CENPJ/TUBB	9
CC	GO:0005818	aster	2	124	0.016129	11/19717	0.00207923	0.0108828	0.00791644	MAPRE3/KIF18B	2
BP	GO:0060271	cilium assembly	9	122	0.0737705	366/18670	0.000675909	0.00546078	0.0042185	CDK1/DCX/PLK1/TUBA1A/CKAP5/HDAC6/TUBB4B/CENPJ/TUBB	9
CC	GO:0000776	kinetochore	17	124	0.137097	135/19717	1.05667e-17	4.33233e-16	3.15146e-16	CCNB1/CENPA/CENPI/INCENP/MAD2L1/PLK1/CLIP1/AURKB/CKAP5/NDC80/ZWINT/HJURP/SPC25/CENPO/CDT1/SKA1/SKA2	17
CC	GO:0000779	condensed chromosome, centromeric region	16	124	0.129032	118/19717	3.01015e-17	1.05785e-15	7.69513e-16	CCNB1/CENPA/INCENP/MAD2L1/PLK1/AURKB/CKAP5/NDC80/ZWINT/HJURP/SPC25/NCAPG/CENPO/CDT1/SKA1/SKA2	16
BP	GO:1902903	regulation of supramolecular fiber organization	9	122	0.0737705	352/18670	0.00051137	0.00436805	0.00337436	CFL1/STMN1/MAPT/CLIP1/SNCA/HDAC6/MAPRE3/CKAP2/CAMSAP1	9
BP	GO:0018209	peptidyl-serine modification	9	122	0.0737705	322/18670	0.000267392	0.00248073	0.00191639	CCNB1/CDK1/PLK1/SNCA/CDC7/AURKB/HDAC6/PWP1/CLSPN	9
CC	GO:0072686	mitotic spindle	14	124	0.112903	109/19717	6.92488e-15	1.70352e-13	1.23919e-13	CDK1/KIF11/KIFC1/MAD2L1/CDC7/AURKB/KIF23/MAPRE3/TPX2/RACGAP1/NUSAP1/KIF18B/CKAP2L/SKA1	14
BP	GO:0007568	aging	9	122	0.0737705	321/18670	0.000261335	0.0024362	0.00188198	CDK1/CHEK1/FOXM1/PRNP/SNCA/TYMS/AURKB/FBXO5/CACYBP	9
CC	GO:0000777	condensed chromosome kinetochore	14	124	0.112903	105/19717	4.0466e-15	1.10607e-13	8.04587e-14	CCNB1/CENPA/INCENP/MAD2L1/PLK1/CKAP5/NDC80/ZWINT/HJURP/SPC25/CENPO/CDT1/SKA1/SKA2	14
BP	GO:0018105	peptidyl-serine phosphorylation	9	122	0.0737705	299/18670	0.000154171	0.00155697	0.00120277	CCNB1/CDK1/PLK1/SNCA/CDC7/AURKB/HDAC6/PWP1/CLSPN	9
BP	GO:0043624	cellular protein complex disassembly	9	122	0.0737705	217/18670	1.28471e-05	0.000166358	0.000128513	CFL1/KIF2A/STMN1/CKAP5/HDAC6/CKAP2/STMN4/KIF18B/CAMSAP1	9
BP	GO:0071897	DNA biosynthetic process	9	122	0.0737705	196/18670	5.65912e-06	8.0684e-05	6.23291e-05	CCT6A/PCNA/RFC2/RFC5/TCP1/TYMS/AURKB/CCT2/POLE3	9
BP	GO:2001252	positive regulation of chromosome organization	9	122	0.0737705	174/18670	2.13346e-06	3.56619e-05	2.75491e-05	CCNB1/CCT6A/FEN1/TCP1/AURKB/DLGAP5/CCT2/NABP2/CDT1	9
CC	GO:0030496	midbody	13	124	0.104839	173/19717	6.83954e-11	1.40211e-09	1.01993e-09	CDK1/INCENP/PLK1/RAN/PRC1/AURKB/KIF23/KIF20A/TXNDC9/MAPRE3/KIF4A/RACGAP1/SHCBP1	13
BP	GO:2001251	negative regulation of chromosome organization	9	122	0.0737705	146/18670	4.91798e-07	9.63228e-06	7.44102e-06	CCNB1/MAD2L1/MCM2/PLK1/SNCA/AURKB/NDC80/FBXO5/CDT1	9
BP	GO:0000725	recombinational repair	9	122	0.0737705	135/18670	2.52691e-07	5.21243e-06	4.02665e-06	CHEK1/FEN1/MCM2/MCM3/MCM6/CDC7/TIMELESS/PSMD14/NABP2	9
CC	GO:0000922	spindle pole	13	124	0.104839	164/19717	3.48858e-11	7.80173e-10	5.6752e-10	CCNB1/KIF2A/KIF11/MAD2L1/PLK1/PRC1/AURKB/DLGAP5/CKAP5/TUBGCP2/TPX2/CKAP2/CKAP2L	13
BP	GO:0000724	double-strand break repair via homologous recombination	9	122	0.0737705	134/18670	2.37136e-07	4.94416e-06	3.81941e-06	CHEK1/FEN1/MCM2/MCM3/MCM6/CDC7/TIMELESS/PSMD14/NABP2	9
BP	GO:0051261	protein depolymerization	9	122	0.0737705	109/18670	3.97253e-08	9.50955e-07	7.34621e-07	CFL1/KIF2A/STMN1/CKAP5/HDAC6/CKAP2/STMN4/KIF18B/CAMSAP1	9
MF	GO:0008017	microtubule binding	24	122	0.196721	246/17697	4.429e-21	6.11202e-19	4.47562e-19	DCX/KIF2A/KIF5B/KIF11/KIFC1/MAPT/PLK1/PRNP/CLIP1/SNCA/PRC1/KIF23/CKAP5/HDAC6/KIF20A/TUBGCP2/MAPRE3/KIF4A/RACGAP1/NUSAP1/KIF18B/CAMSAP1/SKA1/SKA2	24
BP	GO:0051304	chromosome separation	9	122	0.0737705	90/18670	7.30003e-09	2.02211e-07	1.5621e-07	CCNB1/MAD2L1/PLK1/AURKB/DLGAP5/NDC80/NCAPH/FBXO5/CDT1	9
BP	GO:0031145	anaphase-promoting complex-dependent catabolic process	9	122	0.0737705	81/18670	2.83246e-09	9.46921e-08	7.31505e-08	CCNB1/CDK1/MAD2L1/PLK1/PSMB2/AURKB/PSMD14/FBXO5/UBE2S	9
BP	GO:0090307	mitotic spindle assembly	9	122	0.0737705	56/18670	9.4287e-11	4.25169e-09	3.28447e-09	KIF2A/KIF11/KIFC1/PLK1/AURKB/KIF23/TPX2/KIF4A/RACGAP1	9
CC	GO:0005876	spindle microtubule	12	124	0.0967742	59/19717	1.9381e-15	5.95967e-14	4.33523e-14	CDK1/KIF2A/KIF11/PLK1/PRC1/AURKB/MAPRE3/KIF4A/NUSAP1/KIF18B/SKA1/SKA2	12
MF	GO:0015631	tubulin binding	29	122	0.237705	336/17697	6.98082e-24	1.92671e-21	1.41086e-21	DCX/KIF2A/KIF5B/KIF11/KIFC1/STMN1/MAPT/PLK1/PRNP/CLIP1/SNCA/TBCE/PRC1/KIF23/CKAP5/HDAC6/KIF20A/TUBGCP2/MAPRE3/KIF4A/CACYBP/RACGAP1/NUSAP1/CENPJ/STMN4/KIF18B/CAMSAP1/SKA1/SKA2	29
CC	GO:0005875	microtubule associated complex	11	124	0.0887097	152/19717	3.18127e-09	5.21728e-08	3.7952e-08	DCX/KIF2A/KIF5B/KIF11/KIFC1/AURKB/KIF23/HDAC6/KIF20A/KIF4A/KIF18B	11
CC	GO:0000794	condensed nuclear chromosome	10	124	0.0806452	99/19717	6.51238e-10	1.23234e-08	8.96441e-09	CCNB1/CENPA/CHEK1/INCENP/PLK1/SUV39H1/AURKB/NDC80/NCAPH/CENPO	10
