# Supplementary material for: Tubulin alpha-1b chain was identified as a prognosis and immune biomarker in pan-cancer combing with experimental validation in breast cancer
Source: Sci Rep. 2024 Apr 8;14:8201. doi: 10.1038/s41598-024-58982-z (PMC11001892; doi:10.1038/s41598-024-58982-z)
Supplement: Supplementary file 3 — Supplementary Table 4. [file 41598_2024_58982_MOESM3_ESM.xlsx]

## Sheet: Sheet1
Gene Symbol	Gene ID	PCC
RACGAP1	ENSG00000161800.12	0.71
TUBB	ENSG00000196230.12	0.7
TUBAP2	ENSG00000214391.3	0.69
KIF4A	ENSG00000090889.11	0.69
MCM6	ENSG00000076003.4	0.67
RFC2	ENSG00000049541.10	0.67
NUSAP1	ENSG00000137804.12	0.66
RAN	ENSG00000132341.11	0.66
CENPO	ENSG00000138092.10	0.66
TPX2	ENSG00000088325.15	0.65
FEN1	ENSG00000168496.3	0.65
SPC25	ENSG00000152253.8	0.65
DCLRE1B	ENSG00000118655.4	0.65
CCNB1	ENSG00000134057.14	0.65
FBXO5	ENSG00000112029.9	0.65
UBE2T	ENSG00000077152.9	0.64
KIF20A	ENSG00000112984.11	0.64
STMN1	ENSG00000117632.20	0.64
RFC5	ENSG00000111445.13	0.64
KIFC1	ENSG00000237649.7	0.64
FAM64A	ENSG00000129195.15	0.64
CENPL	ENSG00000120334.15	0.64
H2AFV	ENSG00000105968.18	0.64
DLGAP5	ENSG00000126787.12	0.63
KIF23	ENSG00000137807.13	0.63
MAD2L1	ENSG00000164109.13	0.63
GTSE1	ENSG00000075218.18	0.63
NCAPG	ENSG00000109805.9	0.63
CKAP2L	ENSG00000169607.12	0.63
NCAPH	ENSG00000121152.9	0.63
NCAPG2	ENSG00000146918.19	0.63
PLK1	ENSG00000166851.14	0.63
CENPI	ENSG00000102384.13	0.62
PPP1R8	ENSG00000117751.17	0.62
SKA2	ENSG00000182628.12	0.62
TIMELESS	ENSG00000111602.11	0.62
KIF11	ENSG00000138160.5	0.62
SUV39H1	ENSG00000101945.16	0.62
KIF18B	ENSG00000186185.13	0.62
HNRNPR	ENSG00000125944.18	0.62
CCNF	ENSG00000162063.12	0.62
RNASEH2A	ENSG00000104889.4	0.62
CHEK1	ENSG00000149554.12	0.61
H2AFZ	ENSG00000164032.11	0.61
SKA1	ENSG00000154839.9	0.61
CCNB2	ENSG00000157456.7	0.61
POLE3	ENSG00000148229.12	0.61
PCNA	ENSG00000132646.10	0.61
SSRP1	ENSG00000149136.7	0.61
TYMS	ENSG00000176890.15	0.61
UHRF1	ENSG00000276043.4	0.61
MCM2	ENSG00000073111.13	0.61
SGOL1	ENSG00000129810.14	0.61
TMPO	ENSG00000120802.13	0.61
CCNA2	ENSG00000145386.9	0.61
PRC1	ENSG00000198901.13	0.61
CENPA	ENSG00000115163.14	0.61
LMNB1	ENSG00000113368.11	0.6
MRTO4	ENSG00000053372.4	0.6
CDCA5	ENSG00000146670.9	0.6
RRM2	ENSG00000171848.13	0.6
UBE2S	ENSG00000108106.13	0.6
INCENP	ENSG00000149503.12	0.6
KPNA2	ENSG00000182481.8	0.6
DTYMK	ENSG00000168393.12	0.6
RNPS1	ENSG00000205937.11	0.6
FOXM1	ENSG00000111206.12	0.6
HJURP	ENSG00000123485.11	0.6
CACYBP	ENSG00000116161.17	0.6
SAE1	ENSG00000142230.11	0.6
CLSPN	ENSG00000092853.13	0.6
DHFR	ENSG00000228716.6	0.6
ZWINT	ENSG00000122952.16	0.6
CDC7	ENSG00000097046.12	0.6
PSMD14	ENSG00000115233.11	0.6
MCM3	ENSG00000112118.17	0.6
WDR76	ENSG00000092470.11	0.6
CHAF1B	ENSG00000159259.7	0.59
SHCBP1	ENSG00000171241.8	0.59
GINS1	ENSG00000101003.9	0.59
AURKB	ENSG00000178999.12	0.59
MELK	ENSG00000165304.7	0.59
H2AFX	ENSG00000188486.3	0.59
TROAP	ENSG00000135451.12	0.59
CDK1	ENSG00000170312.15	0.59
NABP2	ENSG00000139579.12	0.59
NDC80	ENSG00000080986.12	0.59
CDT1	ENSG00000167513.8	0.59
PWP1	ENSG00000136045.11	0.59
ABCF2	ENSG00000033050.7	0.59
CKAP5	ENSG00000175216.14	0.59
EXO1	ENSG00000174371.16	0.59
PA2G4	ENSG00000170515.13	0.58
CKAP2	ENSG00000136108.14	0.58
PRIM1	ENSG00000198056.13	0.58
RP11-424C20.2	ENSG00000256663.1	0.58
CFL1	ENSG00000172757.12	0.58
SNRNP40	ENSG00000060688.12	0.58
KHDRBS1	ENSG00000121774.17	0.58
PSMB2	ENSG00000126067.11	0.58
